1 **Biosynthesis system of Synechan, a sulfated exopolysaccharide, in the model cyanobacterium**

2 ***Synechocystis* sp. PCC 6803**

3 Kaisei Maeda<sup>1,2</sup>, Yukiko Okuda<sup>1</sup>, Gen Enomoto<sup>1</sup>, Satoru Watanabe<sup>2</sup>, Masahiko Ikeuchi<sup>1,3</sup>

4 <sup>1</sup>Department of Life Sciences (Biology), Graduate School of Arts and Sciences, University of Tokyo,

5 Komaba, Meguro, Tokyo 153-8902, Japan

6 <sup>2</sup>(present address) Department of Bioscience, Tokyo University of Agriculture, Sakuragaoka, Setagaya-

7 ku, Tokyo 156-8502, Japan

8 <sup>3</sup>Faculty of Education and Integrated Arts and Sciences, Waseda University, Tokyo 162-8480, Japan

9

10 **Abstract**

11 Extracellular polysaccharides of bacteria contribute to biofilm formation, stress tolerance, and  
12 infectivity. Cyanobacteria, the oxygenic photoautotrophic bacteria, uniquely and widely have sulfated  
13 extracellular polysaccharides and they may utilize the polysaccharides for survival in nature. In addition,  
14 sulfated polysaccharides of cyanobacteria and other organisms have been focused as beneficial  
15 biomaterial. However, very little is known about their biosynthesis machinery and function in  
16 cyanobacteria. Here we found that the model cyanobacterium, *Synechocystis* sp. PCC 6803, formed  
17 bloom-like cell aggregates using sulfated extracellular polysaccharides (designated as synechan) and  
18 identified whole set of genes responsible for synechan biosynthesis and its transcriptional regulation,  
19 thereby suggesting a model for the synechan biosynthesis apparatus. Because similar genes are found in  
20 many cyanobacterial genomes with wide variation, our findings may lead elucidation of various sulfated  
21 polysaccharides, their functions, and their potential application in biotechnology.

22

## 23 **Introduction**

24           Bacterial extracellular polysaccharides establish biofilms for nutrient supply and stress  
25 avoidance, and they sometimes support cellular activities such as motility and infectivity (*Woodward*  
26 *and Naismith, 2016*). Generally, the polysaccharide chains consist of a few types of sugars (with or  
27 without chemical modifications) and are anchored on cells (capsular polysaccharides, CPS) or exist as  
28 nonanchored exopolysaccharides (EPS). Nonetheless, their molecular structures vary greatly, e.g.,  
29 branching schemes, sugar constituents, and modifications, and thus their physical properties also vary.

30 Bacterial extracellular polysaccharides and lipopolysaccharides are produced and exported via three  
31 distinct pathways: the Wzx/Wzy-dependent pathway, ABC-dependent pathway, and synthase-dependent  
32 pathway (*Schmid et al., 2015*). Every bacterium can produce several extracellular polysaccharides, and  
33 production often depends on environmental conditions. Some extracellular polysaccharides have been  
34 appropriated for use as biopolymers for food, cosmetics, medicine (*Freitas et al., 2014, Lapasin and*  
35 *Pricl, 1995*).

36 Cyanobacteria, the oxygenic photoautotrophic bacteria that inhabit almost every ecosystem on  
37 Earth, contribute to the global photosynthetic production (*Flombaum et al., 2013, Mangan et al., 2016*).  
38 Cyanobacteria produce various extracellular polysaccharides to form colonies, which are planktonic or  
39 attached on solid surfaces, likely to stay in a phototrophic niche in nature (*De Philippis and Vincenzini,*  
40 *1998*). A notable example is the water bloom, a dense population of cyanobacterial cells that floats on  
41 the water surface and often produces cyanotoxins and extracellular polysaccharides (*Huisman et al.,*  
42 *2018*). The extracellular polysaccharides are also important for photosynthetic production of  
43 cyanobacteria and their application (*Kumar et al., 2018*). However, very little is known about their  
44 biosynthesis except for extracellular cellulose. A thermophilic cyanobacterium (*Thermosynechococcus*  
45 *vulcanus*) accumulates cellulose to form cell aggregation (*Kawano et al., 2011*). This cellulose is  
46 produced by cellulose synthase with unique tripartite system and regulations (*Enomoto et al., 2015,*  
47 *Maeda et al., 2018*). In the cyanobacterial genomes, there are still many putative genes for extracellular  
48 polysaccharide biosynthesis.

49           Uniquely, many cyanobacterial extracellular polysaccharides are sulfated, i.e., as a sugar  
50   modification (*Pereira et al., 2009*). Sulfated polysaccharides are also produced by animals (as  
51   glycosaminoglycan in the extracellular matrix such as heparan sulfate) and algae (as cell-wall  
52   components such as carrageenan) but are scarcely known in other bacteria or plants (*Ghosh et al., 2009*).  
53   Major examples of cyanobacterial sulfated polysaccharides are spirulan from *Arthrospira platensis*  
54   (vernacular name, “Spirulina”), sacran from *Aphanothece sacrum* (vernacular name, “Suizenji-Nori”)  
55   and cyanoflan from *Cyanothece* sp. CCY 0110 (*Mota et al., 2020, Mouhim et al., 1993, Okajima et al.,*  
56   2008). These sulfated polysaccharides are used for formation of colony and biofilm and may be  
57   functionally relevant to the ecology of cyanobacteria (*Fujishiro et al., 2004*). In addition, the  
58   bioactivities (antiviral, antitumor, and anti-inflammatory) of sulfated polysaccharides from  
59   cyanobacteria were reported, too (*Flores et al., 2019a, Hayashi et al., 1996, Ngatu et al., 2012*).  
60   However, very little is known about their biosynthesis machinery and physiological functions. On the  
61   other hand, biosynthesis and modification of animal sulfated polysaccharides have been extensively

62 studied because of their importance to tissue protection, tissue development, and immunity (*Karamanos*  
63 *et al., 2018, Sasisekharan et al., 2006*) and potential applications in healthy foods, biomaterials, and  
64 medicines (*Jiao et al., 2011, Wardrop and Keeling, 2008*).

65           The poor understanding about cyanobacterial sulfated polysaccharide biosynthesis is probably  
66 due to low or no accumulation of sulfated polysaccharides in typical model species (*Pereira et al., 2009*).  
67 More than three decades ago, Panoff et al. reported sulfated polysaccharides in two related model  
68 cyanobacteria, *Synechocystis* sp. PCC 6803 and *Synechocystis* sp. PCC 6714 (hereafter *Synechocystis*  
69 6803 and *Synechocystis* 6714) (*Panoff et al., 1988*). Recently, Flores et al. confirmed sulfated  
70 polysaccharides and reported their enhanced accumulation in a sigma factor *sigF* mutant for global cell  
71 surface regulation in *Synechocystis* 6803 (*Flores et al., 2019b*). In parallel, several papers have studied  
72 genes that could be involved in extracellular polysaccharides biosynthesis in *Synechocystis* 6803, but no  
73 clear results were obtained about the sulfated polysaccharide (*Fisher et al., 2013, Foster et al., 2009,*  
74 *Jittawuttipoka et al., 2013, Pereira et al., 2019*). Here we found that a motile substrain of *Synechocystis*

75 6803 showed bloom-like cell aggregation and sulfated EPS production, but a non-motile substrain (a  
76 standard substrain for photosynthesis study) did not. By gene disruption and overexpression, we first  
77 identified a whole set of genes responsible for sulfated EPS biosynthesis and its regulatory system,  
78 opening the way to engineering of their production.

79

## 80 **Results**

### 81 ***Bloom formation and EPS accumulation in *Synechocystis* sp. PCC 6803***

82 We fortuitously found that a motile substrain of *Synechocystis* 6803 produces EPS and forms  
83 floating cell aggregates resembling a typical cyanobacterial bloom. We established a two-step culture  
84 regime (2-day bubbling culture and subsequent standing culture without bubbling under continuous  
85 light) for reproducible formation of bloom-like aggregates (Fig. 1A, B). The first (bubbling) step allows  
86 for cell propagation and EPS production, whereas the second (standing) step allows for heavy-cell  
87 aggregation and flotation, even though *Synechocystis* 6803 does not possess genes for intracellular gas

88 vesicles (*Harke et al., 2016*). In *Synechocystis* 6803, cell flotation accompanying the generation of  
89 extracellular gas bubbles was suppressed by inactivation of photosynthesis (Fig. 1C), suggesting that  
90 gas derived from photosynthesis drives the upward movement of cells embedded in viscous EPS. The  
91 non-motile, glucose-tolerant substrain—commonly used for photosynthesis research—did not aggregate  
92 or float.

93 We first isolated crude EPS from the bloomed culture by membrane filtration (Fig. S1A). The  
94 crude EPS consisted of polysaccharide but very little protein or nucleic acid, and its abundance remained  
95 unchanged during the second culture step (Fig. S1B). As a common feature of diverse EPS biosynthesis  
96 systems in bacteria, membrane-bound glycosyltransferases are particularly important (*Schmid et al.,*  
97 *2015*). So, we screened such glycosyltransferase genes by disruption and revealed that *slr5054* is  
98 essential for bloom formation (Fig. 1D, E and Fig. S2). The EPS preparation was improved by removing  
99 cells before filtration to avoid cell-associated polysaccharides such as CPS (Fig. 1F).  $\Delta slr5054$  lacked  
100 most of the EPS present in the wild type (WT), whereas the CPS and free polysaccharide fractions were



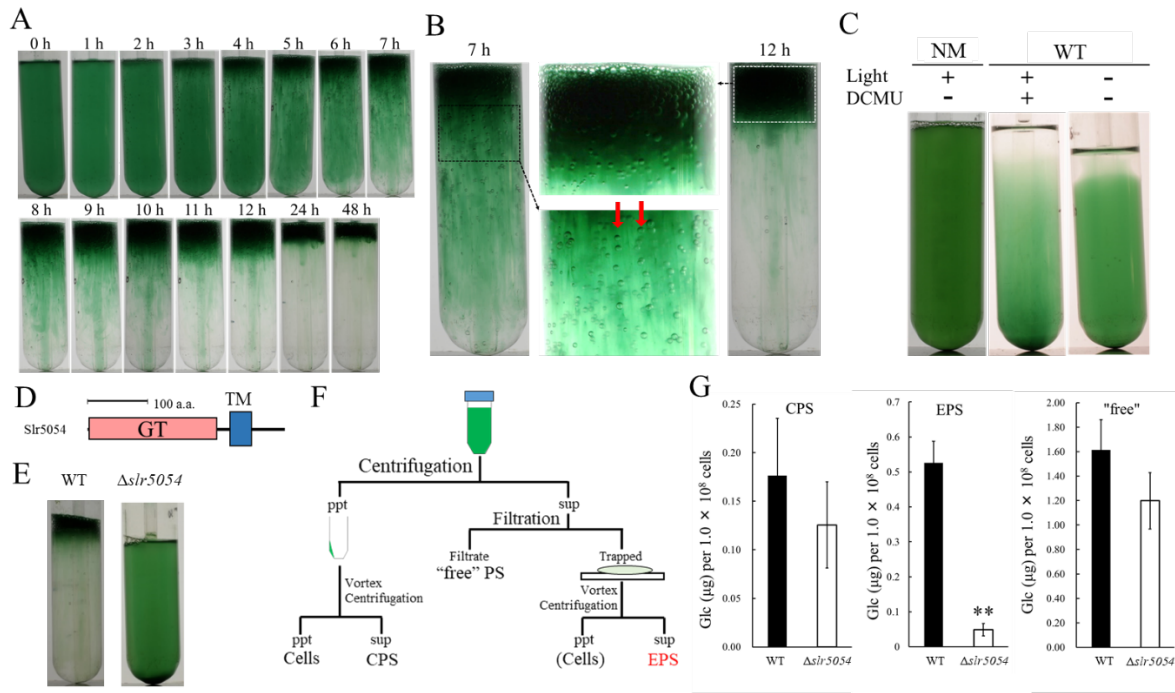

101

102 **Figure 1 Bloom formation and EPS isolation.**

103 **A**, Time course of bloom formation by WT *Synechocystis* 6803 during the second step of culture.

104 Extracellular gas bubbles are formed and trapped in viscous EPS (~1 h). Green vertical columns with  
105 bubbles become apparent at 4 h. Those trapped gas bubbles slowly rise together with the viscous

106 columns. **B**, Enlarged images showing gas bubbles trapped in EPS. Vertically aligned bubbles are

107 indicated by red arrows. **C**, Lack of bloom formation in the non-motile substrain (NM) or WT with or

108 without light and the photosynthesis inhibitor DCMU at 48 h of the second step of culture. **D**, Domain

109 architecture of Slr5054. GT, glycosyltransferase domain; TM, transmembrane region. **E**, Lack of bloom

110 formation in  $\Delta slr5054$  after standing culture for 48 h. **F**, Isolation of EPS from the first step of culture.

111 Cells and CPS were removed from the culture by centrifugation, and EPS in the supernatant was

112 separated from "free" polysaccharide (PS) by membrane filtration followed by a second centrifugation

113 to remove residual cells. CPS was collected from the cell pellet after vortexing and centrifugation. **G**,

114 Sugar content of fractions from WT and  $\Delta slr5054$ . Error bars represent SD (n = 3, \*\*P < 0.005).

115

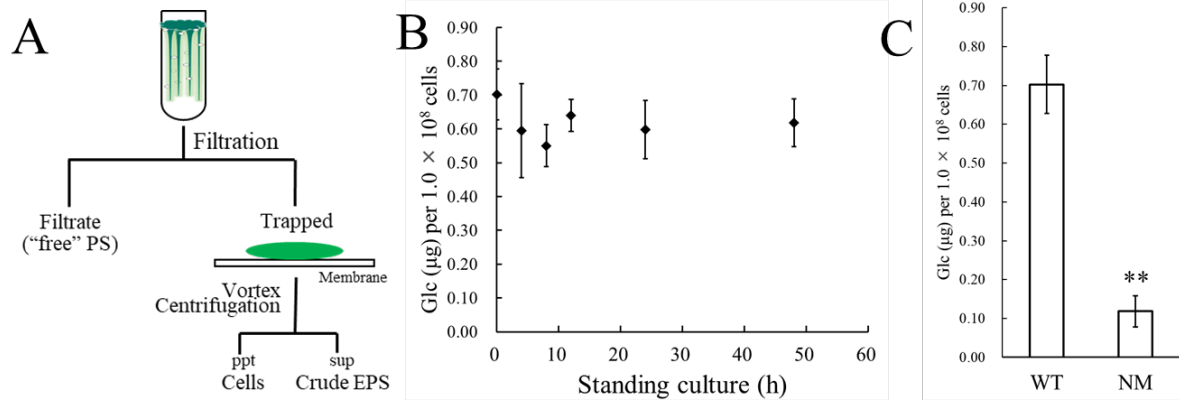

116

117 **Figure S1.** Isolation of crude EPS and sugar analysis.

118 **A**, Protocol for isolating crude EPS from the bloomed culture. The bloom, including EPS and cells at

119 the end of the second (standing) step of culture, was trapped by membrane filtration, and crude EPS

120 was recovered from the bloom by vortexing and centrifugation. PS, polysaccharide; ppt, precipitate;

121 sup, supernatant. **B**, Time course of sugar accumulation in the crude EPS during the standing culture.

122 **C**, Sugar content of the crude EPS from WT, and a non-motile glucose-tolerant substrain (NM). Error

123 bars represent SD ( $n = 3$ ,  $**P < 0.005$ ).

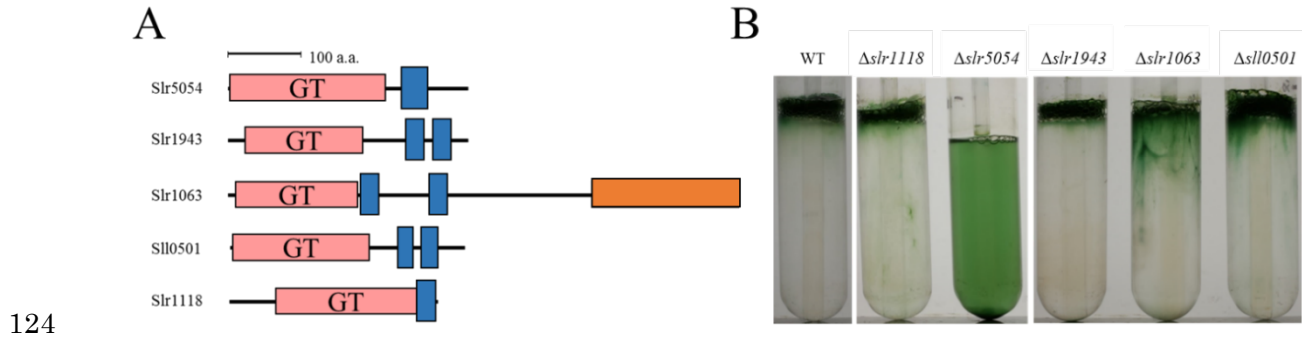

**Figure S2.** Bloom formation by several glycosyltransferase mutants.

**A**, Domain architecture of membrane-bound glycosyltransferases. Red box, glycosyltransferase domain (GT); blue box, transmembrane region; orange box, glycogen phosphorylase domain. **B**, Bloom formation by mutants after the second step of culture.

130 similar in the WT and  $\Delta slr5054$  (Fig. 1G). Then we performed Alcian blue staining to examine the  
131 acidity of the EPS (Fig. S3). Generally, sulfated polysaccharides are stained at pH 0.5 condition, while  
132 acidic polysaccharides, which contain sulfate groups and/or carboxylate groups (such as uronic acids  
133 and carboxylate modification) are stained at pH 2.5 condition (*Bellezza et al., 2006*). The EPS from WT  
134 was clearly stained under both pH conditions, strongly suggestive of the sulfate modification.

135

### 136 ***Gene cluster for the biosynthesis of viscous polysaccharides***

137 *slr5054* resides on a megaplasmid, pSYSM, in a large gene cluster (*slr5042–60*), which we  
138 named *xss* (extracellular sulfated polysaccharide biosynthesis) (Fig. 2A, *xssA–xssS*). This cluster  
139 includes two genes for sulfotransferases (*xssA*, *xssE*), eight genes for glycosyltransferases (*xssB*, *xssC*,  
140 *xssG*, *xssI*, *xssM*, *xssN*, *xssO*, *xssP*), three genes for the polysaccharide polymerization system  
141 (Wzx/flippase; *xssH*, Wzy/polymerase; *xssF*, and polysaccharide co-polymerase [PCP]; *xssK*), one gene  
142 for a putative transcriptional regulator (*xssQ*), a pair of genes for the bacterial two-component

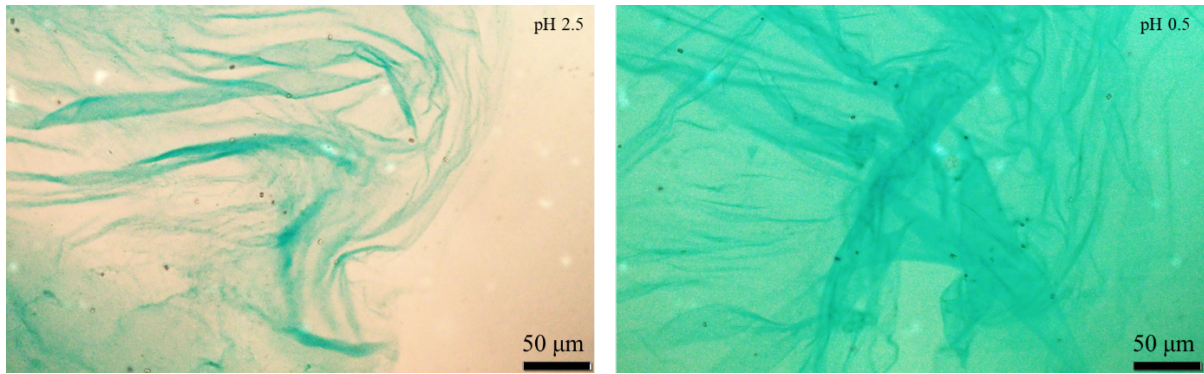

143

144 **Figure S3** Alcian blue staining of EPS from WT.

145 The microscopy images of isolated EPS from WT culture (Fig. 1g) stained with alcian blue at pH 2.5

146 (left) and pH 0.5 (right).

147

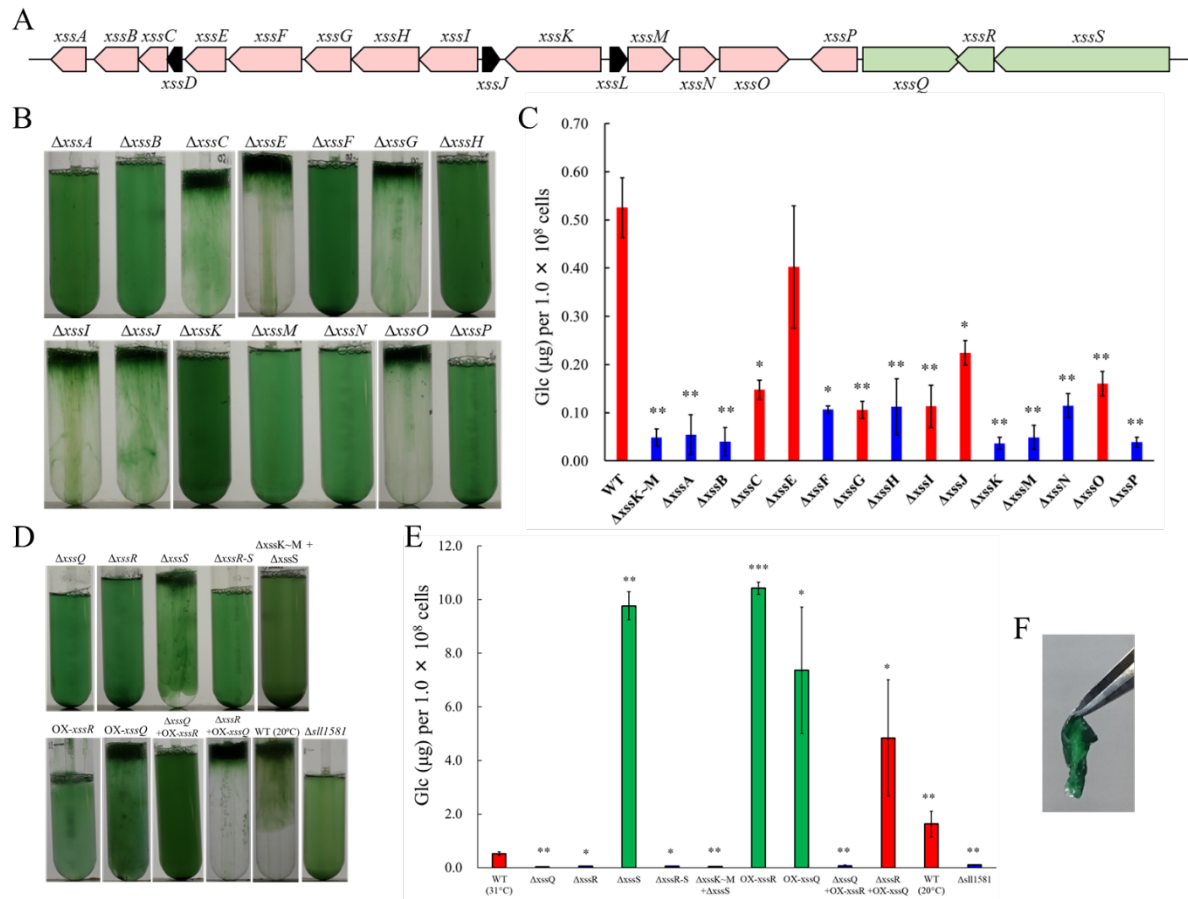

148

149 **Figure 2 The *xss* gene cluster and phenotype of *xss* mutants.**

150 **A**, The *xss* gene cluster. Red, polysaccharide biosynthesis genes; green, regulatory genes; black, genes  
 151 of unknown function. **B**, Bloom formation by the mutants carrying disruptions in the polysaccharide  
 152 biosynthesis *xss* genes. **C**, Total sugar content ( $\mu\text{g}$  glucose per  $1 \times 10^8$  cells) of the EPS fraction from  
 153 mutants in b. Red bars, bloom-forming mutants; blue bars, non-bloom-forming mutants. Error bars  
 154 represent SD (WT grown at  $20^\circ\text{C}$ ,  $n = 6$ ; others,  $n = 3$ ). Statistical significance was determined using  
 155 Welch's *t* test ( $*P < 0.05$ ,  $**P < 0.005$ ,  $***P < 0.0005$ ). **D**, Bloom formation by regulatory mutants, WT  
 156 grown at  $20^\circ\text{C}$ , and OPX mutant ( $\Delta sll1581$ ). **E**, Total sugar content of the EPS fraction from mutants in  
 157 d. Red bars, bloom-forming mutants; green bars, excess-bloom-forming mutants. **F**, A sheet of OX-*xssR*  
 158 cells was stripped off from the agar plate by tweezers. The culture temperature was  $31^\circ\text{C}$  unless  
 159 otherwise stated.

160 phosphorelay system (*xssR*, *xssS*), and genes encoding several small proteins of unknown function  
161 (Table S1, Fig. 2A). All genes except those of unknown function were disrupted individually with a  
162 read-through cassette, and segregation was confirmed by colony PCR (Fig. S4). Bloom formation and  
163 sugar content of the EPS fraction were reduced in many mutants (Fig. 2B, C). In particular, bloom  
164 formation was completely abolished in  $\Delta xssA$ ,  $\Delta xssB$ ,  $\Delta xssF$ ,  $\Delta xssH$ ,  $\Delta xssK$ ,  $\Delta xssM$ ,  $\Delta xssN$ , and  $\Delta xssP$ ,  
165 in which EPS accumulation was also suppressed. Certain glycosyltransferase mutants ( $\Delta xssC$ ,  $\Delta xssG$ ,  
166  $\Delta xssI$ ,  $\Delta xssO$ ) formed blooms but accumulated little EPS, and neither bloom formation nor EPS  
167 accumulation was substantially altered in one sulfotransferase mutant ( $\Delta xssE$ ). In general, the Wzx/Wzy  
168 system in bacteria produces various EPS, lipopolysaccharides, and CPS through four steps: (i)  
169 biosynthesis of a heterooligosaccharide repeat unit on a lipid linker at the cytoplasmic side of the plasma  
170 membrane by a series of glycosyltransferases and modification enzymes, (ii) flip-out of the unit to the  
171 periplasmic side by Wzx, (iii) polymerization by transfer of the nascent polysaccharide chain to the  
172 repeat unit by Wzy, and (iv) export of the EPS chain through the periplasm and outer membrane via PCP

173 **Table S1.** Summary of *Synechocystis* 6803 Xss proteins.

| Category                          | Name | Locus tag      | Function                  | Importance | Regulation |
|-----------------------------------|------|----------------|---------------------------|------------|------------|
| Polysaccharide chain biosynthesis | XssP | <i>sll5057</i> | Priming GT                | +++        | +          |
|                                   | XssB | <i>sll5043</i> | GT                        | +++        | +          |
|                                   | XssM | <i>slr5054</i> | GT                        | ++         | —          |
|                                   | XssN | <i>slr5055</i> | GT                        | ++         | +          |
|                                   | XssC | <i>sll5044</i> | GT                        | +          | +          |
|                                   | XssG | <i>sll5048</i> | GT                        | +          | —          |
|                                   | XssI | <i>sll5050</i> | GT                        | +          | —          |
|                                   | XssO | <i>slr5056</i> | GT                        | +          | +          |
| Modification                      | XssA | <i>sll5043</i> | ST                        | +++        | +          |
|                                   | XssE | <i>sll5046</i> | ST                        | ±          | +          |
| Translocation                     | XssH | <i>sll5049</i> | Wzx/Flippase              | ++         | —          |
| Polymerization and exportation    | XssF | <i>sll5047</i> | Wzy/Polymerase            | ++         | —          |
|                                   | XssK | <i>sll5052</i> | PCP-2a/Exporter           | +++        | —          |
|                                   | XssT | <i>sll1581</i> | OPX/Exporter              | ++         | —          |
| Regulation                        | XssQ | <i>slr5058</i> | Transcriptional regulator | +++        | n.d.       |
|                                   | XssR | <i>sll5059</i> | Response regulator        | +++        | n.d.       |
|                                   | XssS | <i>sll5060</i> | Sensor histidine kinase   | +++        | n.d.       |

174

175 Function: GT, glycosyltransferase; ST, sulfotransferase; PCP, polysaccharide co-polymerase; OPX,

176 outer-membrane polysaccharide export protein.

177 Importance: contribution in EPS accumulation.

178 Regulation: transcriptional regulation of *xss* genes by XssQ/R/S. n.d., not determined.

179



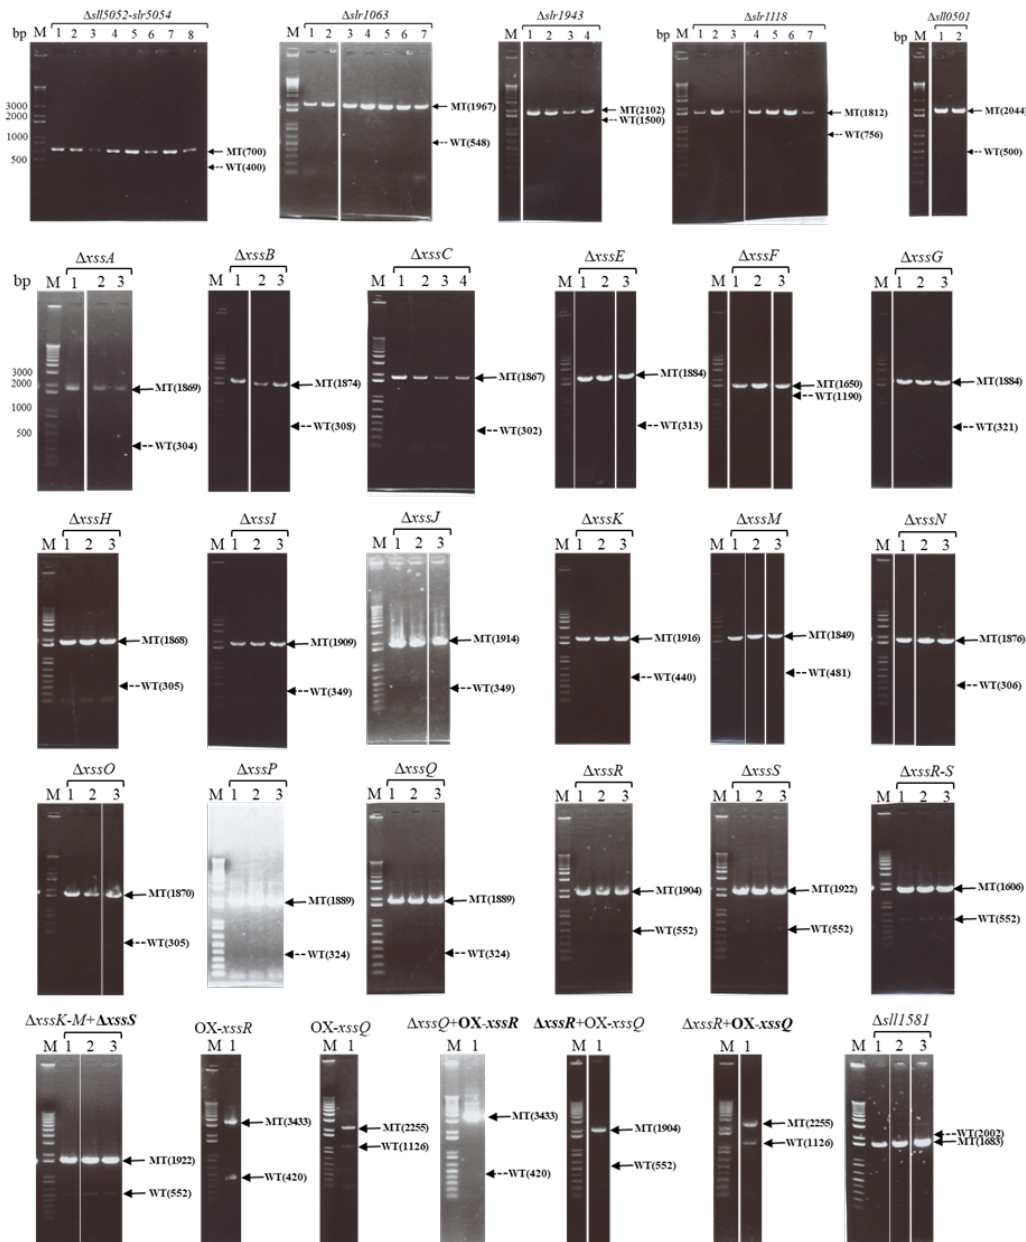

180

181 **Figure S4.** Agarose gel electrophoresis to assess segregation of mutants based on PCR data.

182 M indicates marker lane, and the numbers above each lane indicate the different clones. The band

183 positions of wild type (WT) and mutants (MT) are shown at the right, with theoretical lengths in nt. A

184 solid arrow indicates the existence of the band; a dotted arrow indicates the absence of the band. The

185 bold text in the strain names indicates the region assessed by PCR.

186

187 and the outer-membrane polysaccharide export protein (OPX) (*Islam and Lam, 2014, Schmid et al.,*  
188 *2015*). It is very likely that the *xss* cluster harbors a whole set of genes for the Wzx/Wzy-dependent  
189 pathway except a gene for OPX.

190

### 191 ***Regulation of the sulfated EPS biosynthesis***

192 The sensory histidine kinase mutant  $\Delta xssS$  accumulated a much larger amount of EPS than  
193 WT, whereas mutants of the cognate response regulator *xssR* and transcriptional regulator *xssQ* had a  
194 null phenotype with regard to both bloom formation and EPS accumulation (Fig. 2D, E, Table S2). The  
195 double mutant  $\Delta xssS/\Delta xssR$  had a phenotype similar to that of  $\Delta xssR$ . Overexpression of *xssR* or *xssQ*  
196 (OX-*xssR*, OX-*xssQ*) resulted in strong bloom formation as well as marked accumulation of viscous  
197 EPS, similar to that seen for  $\Delta xssS$ . The combination of *xssQ* disruption and *xssR* overexpression  
198 ( $\Delta xssQ$ +OX-*xssR*) abrogated bloom formation and EPS accumulation, whereas the combination of *xssQ*  
199 overexpression and *xssR* disruption ( $\Delta xssR$ +OX-*xssQ*) resulted in a pronounced phenotype of bloom

200 formation and EPS accumulation. These results suggested that the sensor histidine kinase XssS  
201 suppresses the response regulator XssR, leading to activation of the transcriptional activator XssQ.  
202 Notably, the OX-*xssR* and OX-*xssQ* strains formed sticky, non-motile, biofilm-like colonies on agar  
203 plates that could be picked by tweezers (Fig. 2F).

204 XssQ is a new type of the signal transduction ATPase with numerous domains (STAND)  
205 protein, because it harbors an N-terminal helix-turn-helix transcriptional DNA-binding domain (Fig.  
206 S5). Typical STAND proteins possess a three-domain module with ATPase activity and are involved in  
207 processes such as apoptosis and immunity in animals, plants, and some bacteria (*Danot et al., 2009*).  
208 Using real-time quantitative PCR (qPCR), we compared gene expression in the *xss* cluster for WT,  $\Delta xssS$ ,  
209 and  $\Delta xssQ$  (Fig. 3A). Expression of five genes (*xssA*, *xssB*, *xssE*, *xssN*, *xssP*) was very low in  $\Delta xssQ$   
210 compared with WT, whereas that of *xssF*, *xssH*, and *xssK* was not substantially affected. These results  
211 suggested that XssQ transcriptionally activates genes encoding sulfotransferases and certain  
212 glycosyltransferases but not genes for polymerization and export via the Wzx/Wzy system. qPCR

213 **Table S2.** EPS accumulation and bloom formation by WT *Synechocystis* 6803 and *xss* mutants.

| Strain name                        | Classification            | Glc ( $\mu\text{g}$ ) per $1.0 \times 10^8$ cells | Ratio (% WT) | Bloom |
|------------------------------------|---------------------------|---------------------------------------------------|--------------|-------|
| WT(31°C)                           |                           | $0.526 \pm 0.062$                                 | 100.0        | +     |
| WT(20°C)                           |                           | $1.629 \pm 0.472$                                 | 309.9        | +     |
| $\Delta xssA$                      | ST3                       | $0.054 \pm 0.042$                                 | 10.4         | -     |
| $\Delta xssB$                      | GT2                       | $0.040 \pm 0.029$                                 | 7.7          | -     |
| $\Delta xssC$                      | GT25                      | $0.148 \pm 0.020$                                 | 28.1         | +     |
| $\Delta xssE$                      | ST3                       | $0.402 \pm 0.127$                                 | 76.6*        | +     |
| $\Delta xssF$                      | Wzy / polymerase          | $0.107 \pm 0.008$                                 | 20.3         | -     |
| $\Delta xssG$                      | GT4                       | $0.105 \pm 0.018$                                 | 20.1         | +     |
| $\Delta xssH$                      | Wzx / Flippase            | $0.112 \pm 0.059$                                 | 23.0         | -     |
| $\Delta xssI$                      | GT4                       | $0.113 \pm 0.044$                                 | 21.6         | +     |
| $\Delta xssJ$                      | -                         | $0.224 \pm 0.025$                                 | 42.6         | +     |
| $\Delta xssK$                      | PCP2a                     | $0.037 \pm 0.012$                                 | 7.0          | -     |
| $\Delta xssM$                      | GT2                       | $0.049 \pm 0.025$                                 | 14.6         | -     |
| $\Delta xssN$                      | GT26                      | $0.115 \pm 0.025$                                 | 21.8         | -     |
| $\Delta xssO$                      | GT2                       | $0.161 \pm 0.025$                                 | 30.6         | +     |
| $\Delta xssP$                      | Priming GT                | $0.039 \pm 0.010$                                 | 7.4          | -     |
| $\Delta xssQ$                      | Transcriptional regulator | $0.036 \pm 0.010$                                 | 6.8          | -     |
| $\Delta xssR$                      | Response regulator        | $0.059 \pm 0.009$                                 | 11.2         | -     |
| $\Delta xssS$                      | Histidine kinase          | $9.770 \pm 0.524$                                 | 1860         | ++    |
| $\Delta xssR-S$                    |                           | $0.062 \pm 0.008$                                 | 11.8         | -     |
| $\Delta xssK \sim M + \Delta xssS$ |                           | $0.044 \pm 0.013$                                 | 8.4          | -     |
| OX- $xssR$                         |                           | $10.426 \pm 0.225$                                | 1984         | ++    |
| OX- $xssQ$                         |                           | $7.359 \pm 2.36$                                  | 1400         | ++    |
| $\Delta xssQ + OX-xssR$            |                           | $0.077 \pm 0.027$                                 | 14.6         | -     |
| $\Delta xssR + OX-xssQ$            |                           | $4.837 \pm 2.169$                                 | 920          | +     |
| 214 $\Delta sll1581$ ( $xssT$ )    | OPX / exporter            | $0.103 \pm 0.012$                                 | 19.6         | -     |

215 Classification: ST, sulfotransferase; GT, glycosyltransferase; PCP, polysaccharide co-polymerase; OPX,

216 outer-membrane polysaccharide export protein. Total sugar content of the EPS fraction is expressed as

217  $\mu\text{g}$  glucose /  $1 \times 10^8$  cells. The errors are based on SD ( $n = 3$ ). \*Close to the detection limit. EPS

218 accumulation ratio, percent of WT grown at 31°C. Bloom formation is summarized from Fig. 2.

219

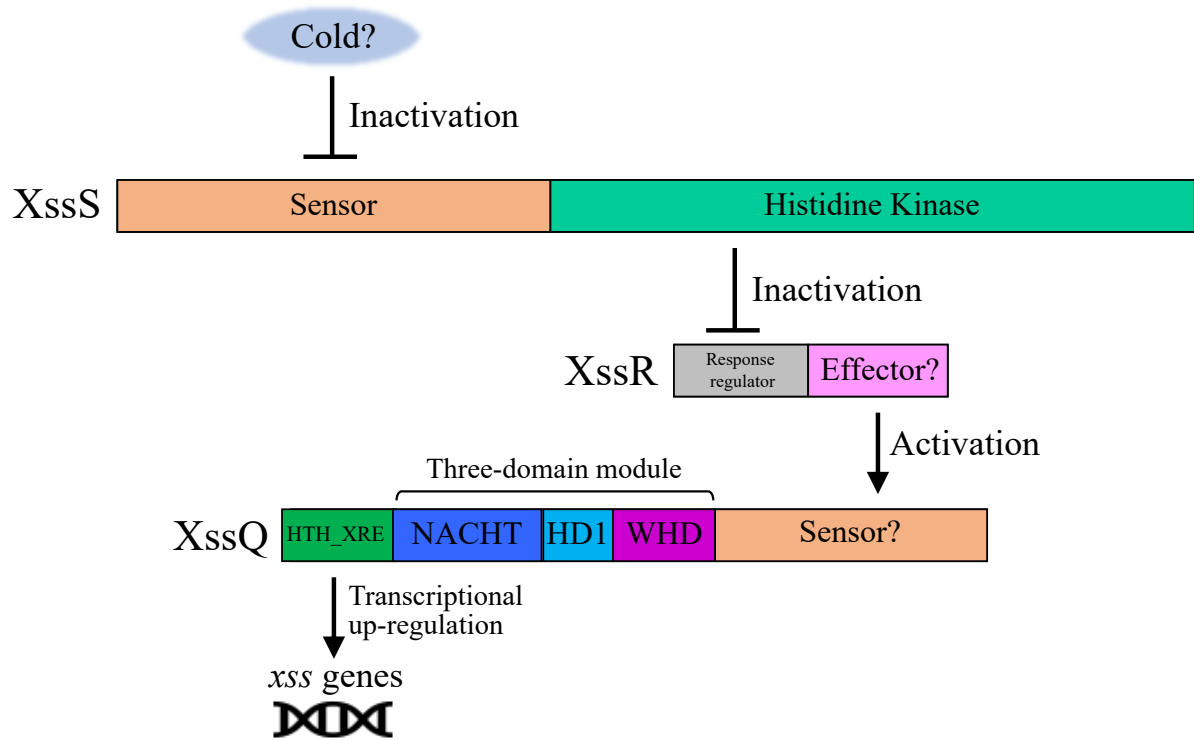

220

221 **Figure S5.** Domain architecture and proposed signal transduction pathway for XssS/XssR/XssQ.

222 Hybrid-type histidine kinase XssS presumably senses a cold signal and transduces it to the response  
223 regulator XssR, which in turn activates the transcription of *xss* genes via the STAND protein XssQ.

224 Generally, STAND proteins consist of the three-domain module, sensor region, and effector region<sup>13</sup>. In

225 XssQ, the three-domain module consisting of the NACHT (NAIP [neuronal apoptosis inhibitor protein]),

226 CIIA [MHC class II transcription activator], HET-E, and TP1 [mammalian telomerase-associated

227 proteins] domain (PF05729), HD1 (helical domain 1), and WHD (winged helix domain) responds to a

228 signal from XssR and oligomerizes, leading to the activation of the N-terminal effector domain (helix-

229 turn-helix XRE family domain [SM00530]).

230

231 analysis of gene expression in  $\Delta xssS$  revealed a tendency for slight upregulation of *xssB*, *xssE*, *xssN*, and  
232 *xssP*. We performed RNA-seq analysis of WT,  $\Delta xssS$ , and  $\Delta xssQ$  to see the transcriptome (Fig. S6). The  
233 genes down-regulated in  $\Delta xssQ$  and up-regulated in  $\Delta xssS$  were mostly *xss* genes. In detail, the regulated  
234 genes were *xssA-E* and *xssL-P*, which were roughly consistent with the qPCR analysis. We conclude  
235 that *xssA-E* and *xssL-P* were specifically regulated by XssS/XssR/XssQ. In a previous report, *xssA-xssE*  
236 and *xssL-xssP* were up-regulated at low temperature in another substrain of *Synechocystis* 6803 (Kopf  
237 *et al.*, 2014b). To test this in our substrain, we measured the sulfated EPS accumulation of WT culture  
238 at 20°C, and it was 3.1-fold greater than that at normal growth temperature (31°C; Fig. 2D, E and Table  
239 S2). This result suggests that XssS/XssR/XssQ is a unique temperature sensor for *xss* gene expression.

240 We aligned nucleotide sequences near the transcription start sites of the regulated genes (*xssA*,  
241 *xssE*, *xssL*, *xssN*, and *xssP*) to find the consensus sequences for XssQ binding (Fig. 3B), according to  
242 the differential RNA-seq-type transcriptomic analysis of *Synechocystis* 6803 (Kopf *et al.*, 2014b). There  
243 are single or tandem consensus sequence, AAGTTXXAC. To confirm the binding of XssQ to this region,

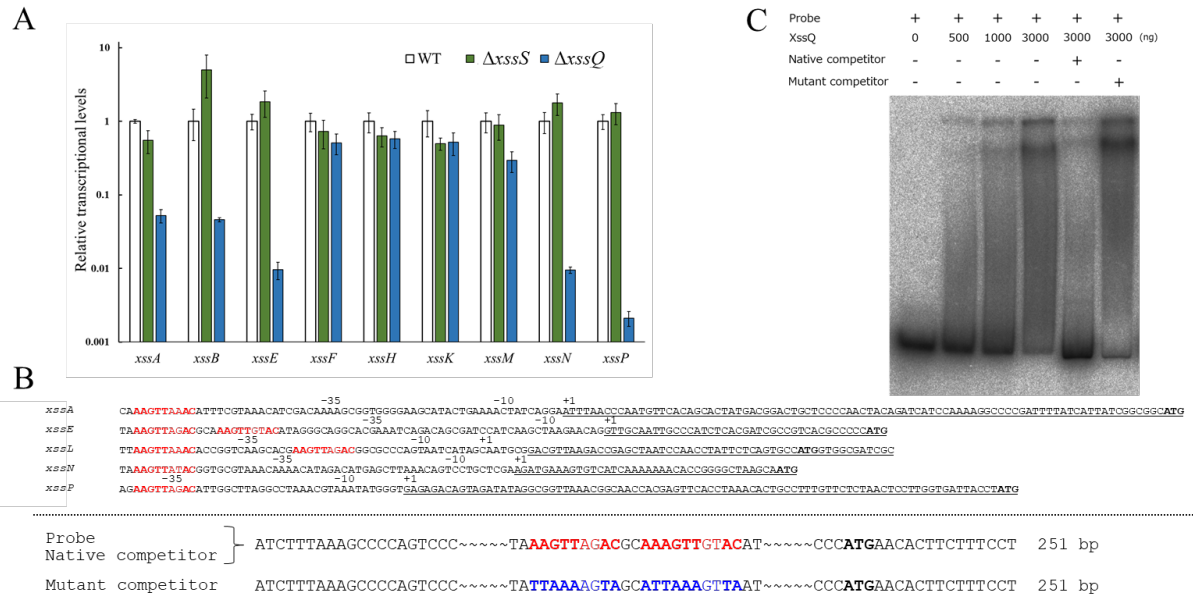

244

245 **Figure 3 Transcriptional regulation of *xss* genes.**

246 **A**, Transcript levels for *xss* genes in WT,  $\Delta xssS$ , and  $\Delta xssQ$  measured by qPCR. The internal standard

247 was *rnpB*. Relative expression levels were obtained by normalization to the transcript levels of each

248 gene in WT. Error bars represent SD (n = 3, biological triplicates). **B**, upper; Sequence comparison of

249 upstream regions of the five regulated genes. Putative consensus regions are shown in red and fully

250 conserved nucleotides are shown in bold letter. Underlines represent transcribed regions based on the

251 report(Kopf et al., 2014b) and initiation codons of regulated genes are shown in black/bold letters. **B**,

252 lower: Sequences of DNA probe and competitors for *xssE* (native and mutant) used for EMSA of C.

253 Consensus regions are shown in red, and mutated region are shown in blue. Total DNA size is 251 bp,

254 where identical sequences are mostly not shown except 20 bp at both ends. **C**, The autoradiogram image

255 of EMSA of XssQ protein and the DNA probe of *xssE* with some competitors.

256

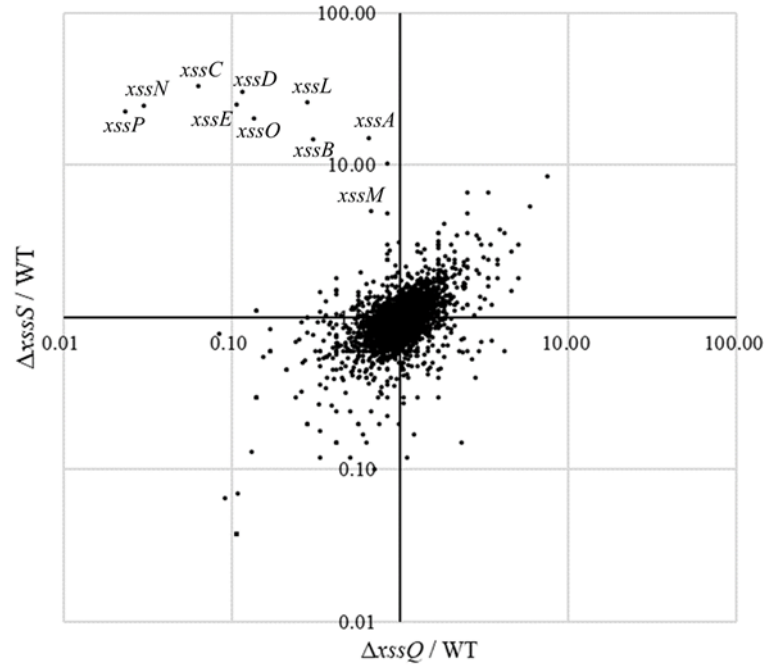

257

258 **Figure S6.** Scatter plot of transcriptome comparison among WT,  $\Delta xssS$ , and  $\Delta xssQ$ .

259 Transcriptional levels were based on RPKM (Reads Per Kilobase of exon per Million mapped reads)

260 value shown in supplementally data 1.

261



262 we performed electrophoretic mobility shift assay (EMSA) using purified recombinant XssQ protein  
263 and a PCR-amplified DNA fragment of *xssE* upstream (Fig. 3C). The band position of the radiolabeled  
264 probe DNA shifted reflecting the concentration of XssQ. This shift was largely eliminated by excess  
265 addition of the unlabeled native competitor, but not by addition of the mutant competitor with mutations  
266 in the consensus region. These results suggest that XssQ recognizes the consensus sequence of *xssE* and  
267 other target genes for their transcriptional activation.

268

### 269 *The chemical composition of the sulfated EPS*

270 EPS of WT and the 19-fold overproduction mutant ( $\Delta xssS$ ) were subjected to chemical  
271 composition analysis (Table 1, Fig. S7). EPS from WT included various sugars and some sulfate groups,  
272 whereas EPS from  $\Delta xssS$  consisted of only four types of sugars and sulfate groups with the near  
273 stoichiometric molar ratio of rhamnose:mannose:galactose:glucose:sulfate of 1:1:1:5:2. This finding  
274 roughly fits with the gene number, i.e., eight glycosyltransferase genes and two sulfotransferase genes.

275 We speculated that the overaccumulation of EPS in  $\Delta xssS$  reflects the true product of the *xss* cluster. The  
276 EPS from WT may contain a considerable amount of unrelated polysaccharides, which were erroneously  
277 recovered together with the *xss* product. Here, the sulfated EPS produced by the *xss* cluster in  
278 *Synechocystis* 6803 was designated “Synechan”.

279

#### 280 ***The OPX protein for synechan biosynthesis***

281 There is no candidate gene in the *xss*-carrying plasmid for the OPX protein of the Wzx/Wzy  
282 system, whereas *sll1581*, an OPX homolog, was found on the main chromosome. Disruption of *sll1581*  
283 ( $\Delta sll1581$ ) abolished bloom formation and EPS accumulation (Fig. 2D, E). Thus, the chromosomal OPX  
284 protein Sll1581 (XssT) appears to serve as the outer-membrane exporter for synechan. Interestingly,  
285 *Synechocystis* 6803 possesses *xssT* (OPX gene) and *sll0923* (a second PCP-2a gene) on the main  
286 chromosome and *xssK* (PCP-2a gene) on the plasmid pSYSM, whereas its close relative *Synechocystis*  
287 6714 harbors only homologs of *sll0923* and *xssT* but lacks the entire plasmid carrying the *xss* cluster.

288 **Table 1.** Chemical composition of the EPS from WT *Synechocystis* 6803 and  $\Delta xssS$  mutant.

|               | <i>Sugars</i>              |        |         |        |           |        |         |       |                          |                 |       | <i>Sulfate residues</i>            |
|---------------|----------------------------|--------|---------|--------|-----------|--------|---------|-------|--------------------------|-----------------|-------|------------------------------------|
|               | Neutral sugars (mol/mol %) |        |         |        |           |        |         |       | Uronic acids (mol/mol %) |                 |       | Substitution degree<br>(mol/mol %) |
|               | Rhamnose                   | Ribose | Mannose | Fucose | Galactose | Xylose | Glucose | Total | Galacturonic acid        | Glucuronic acid | Total |                                    |
| WT            | 16.6                       | N.D.   | 25.7    | 16.2   | 4.7       | 10.6   | 23.1    | 96.9  | N.D.                     | 3.1             | 3.1   | 10.4                               |
| $\Delta xssS$ | 13.1                       | N.D.   | 14.2    | 1.2    | 12.5      | 1.0    | 57.9    | 99.9  | N.D.                     | 0.1             | 0.1   | 26.6                               |

289

290

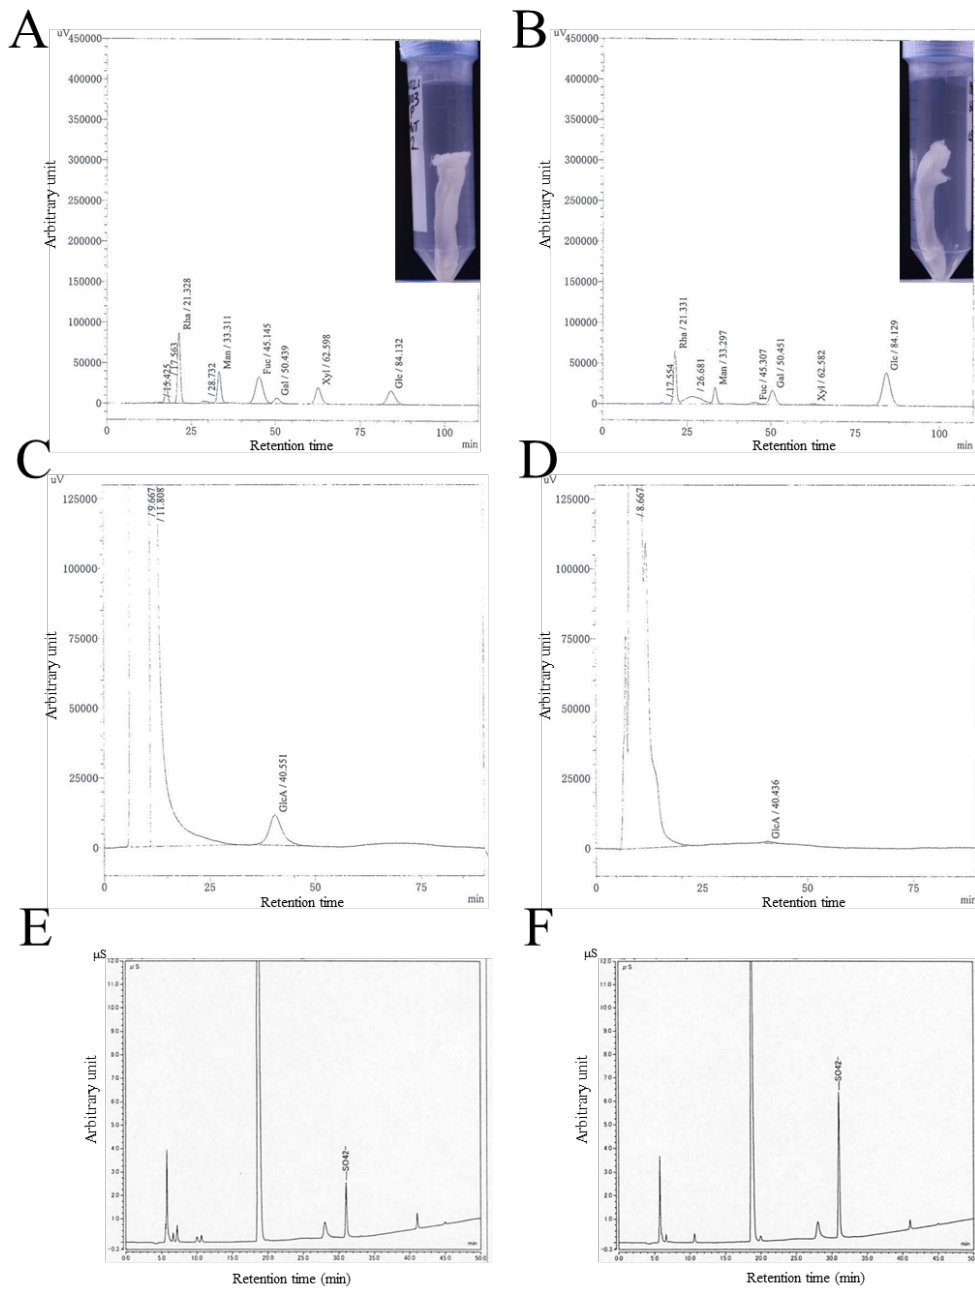

291

292 **Figure S7.** Chromatograms of HPLC and anion exchange column chromatography of EPS.

293 **A and B,** HPLC profiles for neutral sugars in wild-type EPS (A) and  $\Delta xssS$  EPS (B). **c and d,** HPLC  
294 profiles for uronic acids in wild-type EPS (C) and  $\Delta xssS$  EPS (D). The corresponding monosaccharide  
295 and retention time are noted at each peak. **E and F,** HPLC profiles for  $SO_4^{2-}$  after hydrolysis of EPS  
296 samples of wild-type (E) and  $\Delta xssS$  (F).

297 This suggested that XssT serves as an OPX for dual function for both XssK and Sll0923. It is likely that  
298 *Synechocystis* 6803 acquired pSYSM and borrowed the chromosomal OPX gene *xssT* to produce  
299 synechan or, alternatively, *Synechocystis* 6714 may have lost the plasmid.

300

## 301 **Discussion**

302 Summarizing these data, we propose models for synechan biosynthesis apparatus including  
303 OPX and temperature-responsive regulation (Fig. 4A, B and Fig. S5). The model of the Xss apparatus  
304 fits well with the known Wzx/Wzy-dependent apparatus represented by xanthan biosynthesis in  
305 *Xanthomonas campestris* (Katzen *et al.*, 1998). The eight glycosyltransferases including XssP (the  
306 priming glycosyltransferase) produce oligosaccharide repeat unit of eight sugars, which is consistent  
307 with the sugar composition of synechan. These findings suggest that the *xss* cluster on the pSYSM  
308 plasmid harbors a whole set of genes for synechan biosynthesis except the OPX gene (*xssT* on the main  
309 chromosome). Notably, the cluster harbors two sulfotransferase genes, which have not been found to

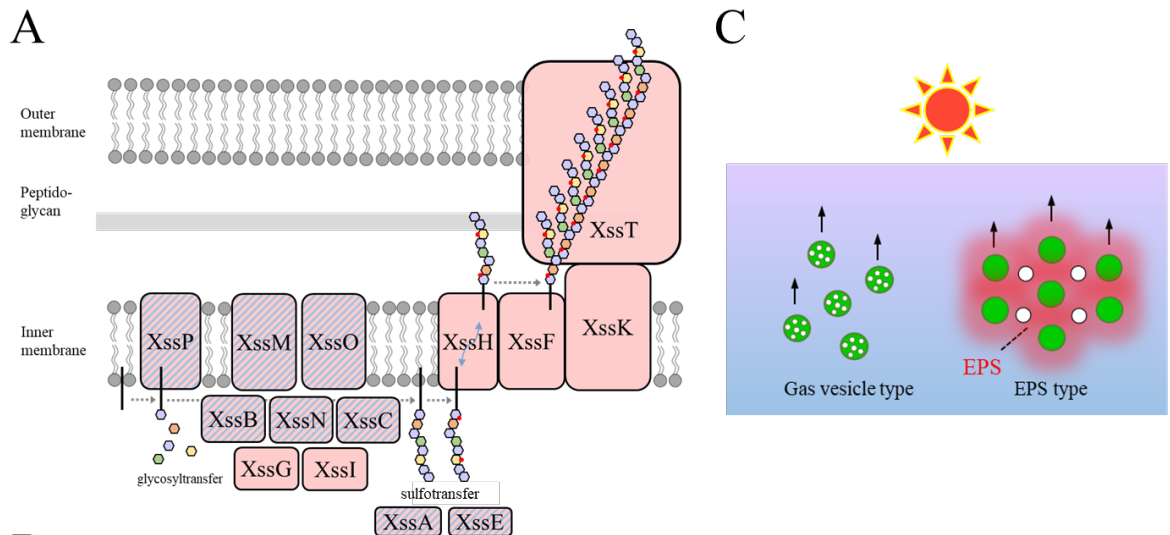

B

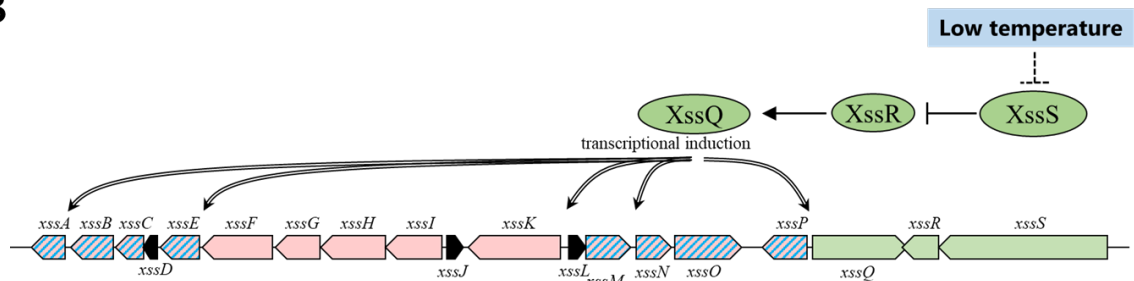

310

311 **Figure 4 Proposed models for the synechan biosynthesis apparatus, transcriptional regulation,**  
 312 **and bloom formation.**

313 **A**, Model for the synechan biosynthesis apparatus with sugar polymerization and modification. Red  
 314 boxes represent biosynthesis components, and red boxes with blue stripes represent transcriptionally  
 315 regulated components. A putative lipid linker is shown as a black rod. Each monosaccharide is shown  
 316 as a small hexagon, and each sulfate group is shown as a red spot. **B**, Signaling and transcriptional  
 317 regulation model. Green arrows and ellipses represent regulatory genes and proteins, respectively. Genes  
 318 for synechan biosynthesis are shown in red, and transcriptionally regulated genes are depicted with blue  
 319 stripes. Arrows with double lines represent transcriptional activation. **C**, Two flotation models for bloom  
 320 formation in cyanobacteria. Left, flotation of cells (green circles) with intracellular gas-filled vesicles  
 321 (white circles). Right, flotation of EPS (red shading)-entrapped cells (green circles) and extracellular  
 322 gas bubbles (white circles), which are generated by photosynthesis.

323

324 our knowledge in other bacterial gene clusters for extracellular polysaccharide biosynthesis.

325 Sulfotransferases, XssA and XssE, belong to distinct subfamilies of bacterial sulfotransferases. We

326 found many sulfotransferase genes in various cyanobacterial genomes by Pfam search (PF00685,

327 PF03567, PF13469). They are mostly found in gene clusters for putative extracellular polysaccharide

328 biosynthesis (Wzx/Wzy-type and ABC-type) (Fig. S8). It should be noted that they are more or less

329 partial as a cluster for extracellular polysaccharide biosynthesis system, whereas the *xss* cluster appears

330 to be complete except the OPX gene in *Synechocystis* 6803. It is well established that the polysaccharide

331 moiety of membrane-anchored lipopolysaccharides and CPS of bacteria are produced and exported by

332 the Wzx/Wzy-dependent or ABC transporter-dependent pathways, whereas free EPS, i.e., xanthan and

333 cellulose, are produced by the Wzx/Wzy-dependent and synthase-dependent pathways but not by the

334 ABC transporter-dependent pathway (Schmid *et al.*, 2015, Willis and Whitfield, 2013). In the literature,

335 a sulfated CPS was reported in *Arthrospira platensis* (formerly *Spirulina platensis*) (Mouhim *et al.*,

336 1993). This sulfated CPS may be produced by an ABC transporter-type gene cluster in Fig. S8. Gene

Cyanothece sp. PCC 7822

*Cyan7822\_0906~0913* 

Arthrospira platensis C1

*SPLC1\_S542070~S542140* 

Acaryochloris marina MBIC11017

*AM1\_5713~5721* 

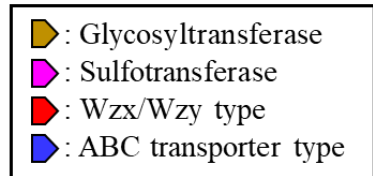

337

338 **Figure S8.** Typical examples of putative gene clusters for biosynthesis of sulfated polysaccharides in

339 cyanobacteria.

340 A part of each cluster harboring genes for sulfotransferases, glycosyltransferases, and polysaccharide

341 biosynthesis/export systems (Wzx/Wzy type and ABC transporter type) in cyanobacterial genomes.

342



343 disruption will confirm such predictions deduced from the gene cluster analyses, although targeted  
344 disruption is not so easy in many cyanobacteria due to poor transformation efficiency except  
345 *Synechocystis* 6803. In contrast, no sulfated polysaccharide has been reported in the other bacteria,  
346 though many sulfotransferases are also registered in Pfam database. Some of them are known to transfer  
347 a sulfuryl group to lipo-oligosaccharides in rhizobia (Nod factor) and mycobacteria (*Mougous et al.*,  
348 2002).

349 XssQ, a STAND protein with a DNA binding domain is indeed the transcriptional activator for  
350 *xssE* and other induced genes. XssQ homologs are found widely throughout the cyanobacteria but the set of  
351 XssS/XssR/XssQ is found near the gene cluster for sulfated EPS biosynthesis with sulfotransferases in many  
352 cyanobacteria (Fig. S9, Table S3). Consensus sequences are also found in upstream of some genes in the  
353 cluster, suggesting that the XssS/XssR/XssQ system may operate universally for induction of sulfated  
354 EPS production under certain environmental conditions such as cold temperature.

355           Acidic polysaccharides containing uronic acids and other carboxylic groups are common in  
356 bacteria, but sulfated polysaccharides are produced exclusively by cyanobacteria (*Pereira et al., 2009*).  
357 To speculate on the physiological significance of sulfated polysaccharides, we summarized the  
358 distribution of sulfotransferase genes in cyanobacteria of various habitats (Table S3). Species living in  
359 high salinity environments such as a salt lake or seawater mostly produce sulfated polysaccharides. The  
360 freshwater species *Synechocystis* sp. PCC 6714 lacks the *xss* genes including sulfotransferases and salt-  
361 resistance genes that are present in the more salt-resistant *Synechocystis* 6803 (*Kopf et al., 2014a*). A  
362 cyanobacterial sulfated polysaccharide, sacran, shows much higher capacity for saline absorption than  
363 does hyaluronic acid, a uronic acid-containing polysaccharide, whereas both absorb pure water  
364 efficiently (*Okajima et al., 2008*). The wide distribution of sulfated polysaccharides among many  
365 cyanobacteria may reflect their inherent compatibility with survival in some saline environments.

366           There are many putative genes that may be involved in biosynthesis and export of  
367 extracellular polysaccharides and lipopolysaccharides in the genome of *Synechocystis* 6803

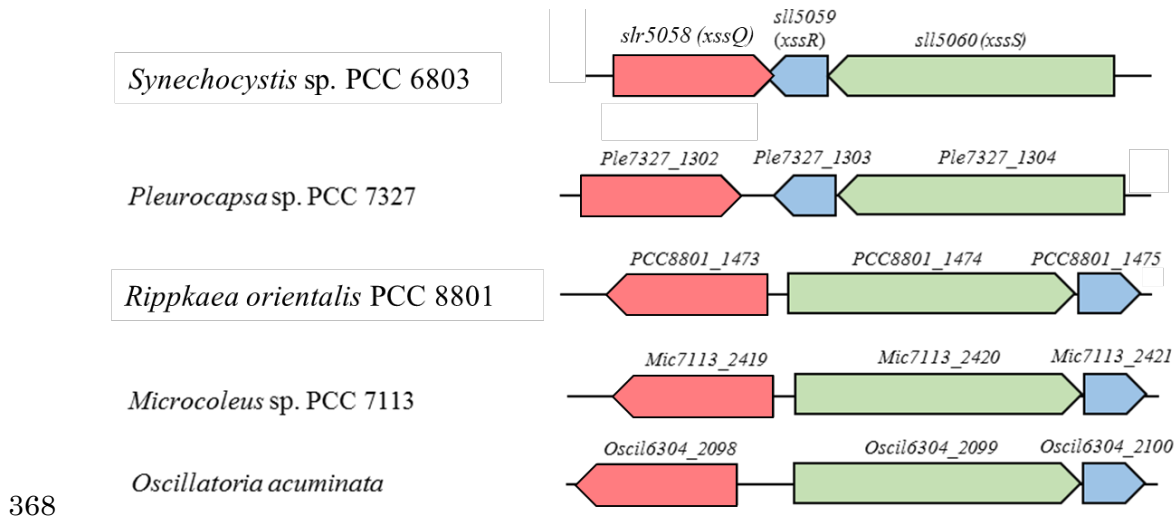

369 **Figure S9.** Homologous gene clusters of *xssS/xssR/xssQ* in some cyanobacteria.

370 The colored blocks indicate genes with direction. The homologs of each gene are represented by their  
371 corresponding colors (red, *xssQ*; blue, *xssR*; green, *xssS*).

372

373 **Table S3.** Number of sulfotransferase genes (STs) in the genome of cyanobacteria collected from various  
374 habitats.

| Habitat                  | Species                                       | STs | Comment                                      |
|--------------------------|-----------------------------------------------|-----|----------------------------------------------|
| Marine                   | <i>Trichodesmium erythraeum</i> IMS101        | 30  |                                              |
| Marine                   | <i>Crocospaera subtropica</i> ATCC 51142      | 14  | Formerly <i>Cyanothece</i> sp. ATCC 51142    |
| Marine                   | <i>Acaryochloris marina</i> MBIC 11017        | 13  |                                              |
| Marine                   | <i>Synechococcus</i> sp. WH8102               | 12  |                                              |
| Marine                   | <i>Pseudanabaena</i> sp. PCC 7367             | 8   |                                              |
| Marine                   | <i>Rivularia</i> sp. PCC 7116                 | 5   |                                              |
| Marine                   | <i>Synechococcus</i> sp. PCC 7002             | 4   |                                              |
| Marine                   | <i>Prochlorococcus marinus</i> MIT 9313       | 2   |                                              |
| Marine                   | <i>Nodularia spumigena</i> UHCC 0039          | 0   |                                              |
| Salt lake                | <i>Arthrospira platensis</i> NIES-39          | 16  |                                              |
| Salt lake                | <i>Acaryochloris</i> sp. CCMEE 5410           | 6   |                                              |
| Terrestrial (rice field) | <i>Gloeotheca verrucosa</i> PCC 7822          | 17  | Formerly <i>Cyanothece</i> sp. PCC 7822      |
| Terrestrial (rice field) | <i>Rippkaea orientalis</i> PCC 8801           | 8   | Formerly <i>Cyanothece</i> sp. PCC 8801      |
| Terrestrial (rice field) | <i>Cyanothece</i> sp. PCC 7425                | 6   |                                              |
| Terrestrial              | <i>Gloeobacter violaceus</i> PCC 7421         | 10  |                                              |
| Terrestrial              | <i>Oscillatoria nigro-viridis</i> PCC 7112    | 10  |                                              |
| Terrestrial              | <i>Leptolyngbya</i> sp. PCC 7376              | 8   |                                              |
| Terrestrial              | <i>Oscillatoria acuminata</i> PCC 6304        | 6   |                                              |
| Terrestrial              | <i>Cylindrospermum stagnale</i> PCC 7417      | 3   |                                              |
| Terrestrial              | <i>Microcoleus</i> sp. PCC 7113               | 2   |                                              |
| Terrestrial              | <i>Crinalium epipsammum</i> PCC 9333          | 2   |                                              |
| Terrestrial              | <i>Nostoc punctiforme</i> NIES-2108           | 1   |                                              |
| Terrestrial              | <i>Nostoc</i> sp. HK-01                       | 1   |                                              |
| Terrestrial              | <i>Nostoc punctiforme</i> PCC 73102           | 0   |                                              |
| Terrestrial              | <i>Chroococciopsis thermalis</i> PCC 7203     | 0   |                                              |
| Hot spring               | <i>Pleurocapsa</i> sp. PCC 7327               | 10  |                                              |
| Hot spring               | <i>Thermoleptolyngbya</i> sp. O-77            | 7   |                                              |
| Hot spring               | <i>Thermosynechococcus elongatus</i> BP-1     | 0   |                                              |
| Hot spring               | <i>Thermosynechococcus vulcanus</i> NIES-2134 | 0   |                                              |
| Hot spring               | <i>Synechococcus</i> sp. JA-3-3Ab             | 0   |                                              |
| Fresh water              | <i>Aphanothece sacrum</i>                     | 11  | Sacran ( <i>Okajima et al.</i> , 2008)       |
| Fresh water              | <i>Microcystis aeruginosa</i> NIES-843        | 9   |                                              |
| Fresh water              | <i>Synechocystis</i> sp. PCC 6803             | 2   | Salt tolerant ( <i>Kopf et al.</i> , 2014a)  |
| Fresh water              | <i>Synechocystis</i> sp. PCC 6714             | 0   | Salt sensitive ( <i>Kopf et al.</i> , 2014a) |
| Fresh water              | <i>Anabaena cylindrica</i> PCC 7122           | 4   |                                              |
| Fresh water              | <i>Calothrix</i> sp. PCC 7507                 | 3   |                                              |
| Fresh water              | <i>Synechococcus elongatus</i> PCC 7942       | 0   | Salt sensitive                               |
| Fresh water              | <i>Nostoc (Anabaena)</i> sp. PCC 7120         | 0   |                                              |
| Fresh water              | <i>Leptolyngbya boryana</i> IAM M-101         | 0   |                                              |
| Fresh water              | <i>Anabaena variabilis</i> ATCC 29413         | 0   |                                              |
| Fresh water              | <i>Calothrix</i> sp. PCC 6303                 | 0   |                                              |
| Fresh water              | <i>Calothrix</i> sp. 336/3                    | 0   |                                              |

375

376

377 (*Fisher et al., 2013, Pereira et al., 2015*). Many of them have been disrupted for characterization. With  
378 regard to the Wzx/Wzy-dependent system, *sll5052 (xssK)* disruption mutant showed no clear phenotypes  
379 for bloom formation or EPS production (*Jittawuttipoka et al., 2013*), probably because the parent strain  
380 did not produce discernable amount of EPS like our nonmotile strain. Similarly, the deletion mutant of  
381 *sll5049 (xssH)* did not show any defect in EPS or CPS accumulation, though related mutants ( $\Delta$ *sll0923*  
382 for a second PCP-2a) were shown to be depleted slightly of both CPS and EPS (*Pereira et al., 2019*).  
383 These results contrast with our null phenotype of  $\Delta$ *sll5052 (xssK)* and  $\Delta$ *sll5049 (xssH)*, probably because  
384 of the difference in the parent strains. In addition, we found that our  $\Delta$ *sll0923* did not show any defect  
385 in the bloom formation. On the other hand, disruption of *sigF (slr1564)* for a sigma factor of global cell  
386 surface regulation increased three to four fold accumulation of sulfated EPS (*Flores et al., 2019a, Flores*  
387 *et al., 2019b*). The proteome analysis of  $\Delta$ *sigF* revealed many (more than 160) proteins except for any  
388 Xss proteins were up-regulated, leaving the sulfated EPS biosynthesis pathway elusive. The sugar  
389 composition of the sulfated EPS of their WT is similar to our WT, although the composition of EPS of

390  $\Delta sigF$  was different for WT or synechan from our  $\Delta xssS$ .

391 To get insights into the difference in bloom formation between the motile and nonmotile  
392 substrains, we compared transcription data (Table S4). It is evident that many *xss* genes on the plasmid  
393 are expressed several times higher in the motile substrain than the nonmotile one except for *xssT* on the  
394 main chromosome, despite that the nucleotide sequence of the *xss* gene cluster was completely  
395 conserved between them. This fact suggests a possibility that another mechanism besides the  
396 XssS/XssR/XssQ contributes to the difference between the substrains. For example, the plasmid copy  
397 number of pSYSM may be higher in the motile substrain than the nonmotile substrain. The plasmid  
398 function is often affected depending on variations in the main chromosome (*Vial and Hommais, 2020*).  
399 Anyway, it is very important to select the parent strain depending on the research purpose.

400 The cyanobacterial bloom rapidly accumulates in populations of cyanobacterial cells floating  
401 on the water surface, which often produce potent cyanotoxins (hepatotoxins, neurotoxins, etc.) (*Merel*  
402 *et al., 2013*). Blooms are thought to be supported mainly by cellular buoyancy due to intracellular

403 **Table S4.** Transcriptional levels of *xss* genes in the motile (WT) and nonmotile (NM) substrains.

| locas tag          | gene name   | WT (RPKM) | NM (RPKM) | WT / NM |
|--------------------|-------------|-----------|-----------|---------|
| <i>sll5042</i>     | <i>xssA</i> | 46.7      | 28.5      | 1.6     |
| <i>sll5043</i>     | <i>xssB</i> | 43.2      | 9.8       | 4.4     |
| <i>sll5044</i>     | <i>xssC</i> | 53.3      | 4.5       | 12.0    |
| <i>ssl5045</i>     | <i>xssD</i> | 77.6      | 6.2       | 12.4    |
| <i>sll5046</i>     | <i>xssE</i> | 291.8     | 24.0      | 12.1    |
| <i>sll5047</i>     | <i>xssF</i> | 17.9      | 8.7       | 2.1     |
| <i>sll5048</i>     | <i>xssG</i> | 71.7      | 28.9      | 2.5     |
| <i>sll5049</i>     | <i>xssH</i> | 41.8      | 21.3      | 2.0     |
| <i>sll5050</i>     | <i>xssI</i> | 26.8      | 33.6      | 0.8     |
| <i>slr5051</i>     | <i>xssJ</i> | 231.6     | 112.0     | 2.1     |
| <i>sll5052</i>     | <i>xssK</i> | 29.0      | 23.7      | 1.2     |
| <i>slr5053</i>     | <i>xssL</i> | 43.9      | 6.5       | 6.8     |
| <i>slr5054</i>     | <i>xssM</i> | 33.2      | 22.5      | 1.5     |
| <i>slr5055</i>     | <i>xssN</i> | 455.5     | 14.4      | 31.6    |
| <i>slr5056</i>     | <i>xssO</i> | 120.5     | 23.3      | 5.2     |
| <i>sll5057</i>     | <i>xssP</i> | 514.1     | 12.6      | 40.9    |
| <i>slr5058</i>     | <i>xssQ</i> | 54.3      | 27.5      | 2.0     |
| <i>sll5059</i>     | <i>xssR</i> | 40.5      | 45.9      | 0.9     |
| <i>sll5060</i>     | <i>xssS</i> | 12.8      | 11.7      | 1.1     |
| 404 <i>sll1581</i> | <i>xssT</i> | 133.3     | 181.8     | 0.7     |

405 Transcriptional level is given as RPKM (Reads Per Kilobase of exon per Million mapped reads).

406

407 proteinaceous gas vesicles constructed by gas vesicle proteins (*Beard et al., 2002, Walsby, 1994*).

408 Moreover, recent studies suggested that extracellular polysaccharides are also important for the bloom

409 formation (*Chen et al., 2019*). Some papers reported that the cells without gas vesicle can form blooms

410 by EPS-dependent manner after artificial addition of divalent cations ( $\text{Ca}^{2+}$  or  $\text{Mg}^{2+}$ ) (*Dervaux et al.,*

411 *2015, Wei et al., 2019*). On the other hand, our study demonstrated that the gas-trapped EPS is sufficient

412 for bloom formation of *Synechocystis* 6803, which does not produce gas vesicles, without addition of

413 any divalent cations. This result is consistent with reports that cyanobacteria without gas vesicles form

414 booms in natural environments, including freshwater lakes (*Casero et al., 2019, du Plooy et al., 2015,*

415 *Steffen et al., 2012*).

416 Finally, sulfated polysaccharides are expected to be healthy foods, industrial materials and

417 medicines (*Jiao et al., 2011, Wardrop and Keeling, 2008*). Some sulfated EPS from *Synechocystis* 6803

418 showed antitumor activity (*Flores et al., 2019a*), though this EPS may not be identical to synechan. The

419 Xss-dependent biosynthesis of synechan in *Synechocystis* 6803 should be a good model for studies of



420 other cyanobacterial sulfated polysaccharides. Combinatorial expression of sulfotransferases and  
421 glycosyltransferases from other cyanobacteria in *Synechocystis* cells will provide clues to their functions.  
422 Heterologous expression of *Synechocystis xss* genes in other organisms will also open a possibility of  
423 large scale production of modified synechan species. Further molecular studies of *xss* genes and related  
424 genes from the database should accelerate screening and potential applications of cyanobacterial  
425 sulfated polysaccharides.

## 426 **Materials and Methods**

### 427 *Cyanobacterial strains and cultures*

428           The motile substrain PCC-P of the unicellular cyanobacterium *Synechocystis* sp. PCC 6803,  
429           which exhibits phototaxis (*Yoshihara et al., 2000*) and forms bloom-like aggregates, was used as the  
430           WT in this work. A non-motile glucose-tolerant substrain, which has been widely used for studies of  
431           photosynthesis, was used for comparison (*Chin et al., 2018*). Cells were maintained in BG11 liquid  
432           medium (*Stanier et al., 1971*) under continuous illumination with bubbling of 1% CO<sub>2</sub> in air at 31°C, or  
433           on 1.5% agar plates. White light of 30  $\mu\text{mol photons m}^{-2}\text{s}^{-1}$  was generated by fluorescent lamps. Cell  
434           density was monitored at 730 nm.

435

### 436 *Construction of plasmids and mutants*

437           Primers used are listed in Table S5. Plasmids and mutants were constructed as described  
438           (*Chin et al., 2018*). In brief, the DNA fragments, antibiotic-resistance cassettes, the *trc* promoter, and

439 plasmid vectors were amplified by PCR using PrimeSTAR MAX DNA polymerase (Takara, Shiga,  
440 Japan) and combined using the In-Fusion System (Takara). The resulting plasmid constructs were  
441 confirmed by DNA sequencing.

442           Gene disruption was performed in two different ways. One method was replacement of a  
443 large portion of a targeted gene(s) with an antibiotic resistance cassette. The other method was  
444 replacement of the translation initiation codon with a stop codon. In both cases, the screening cassette  
445 without the terminator was inserted in the direction of the targeted gene(s) to allow transcriptional  
446 readthrough of the downstream gene(s). For overexpression, gene expression was constitutively driven  
447 by the strong *trc* promoter in two ways: integration of a target gene with the strong *trc* promoter into a  
448 neutral site near *slr0846* or IS203c, or replacement of the target-gene promoter with the *trc* promoter.  
449 Natural transformation and subsequent homologous recombination were performed as described(*Chin*  
450 *et al.*, 2018). The antibiotic concentration for the selection of transformants was 20  $\mu\text{g}\cdot\text{mL}^{-1}$   
451 chloramphenicol, 20  $\mu\text{g}\cdot\text{mL}^{-1}$  kanamycin, and/or 20  $\mu\text{g}\cdot\text{mL}^{-1}$  spectinomycin. Complete segregation of

452 **Table S5.** Primer sequences.

| Product (purpose)                      | Primer name      | Sequence (5' => 3')                      |
|----------------------------------------|------------------|------------------------------------------|
| Antibiotic resistance cassette         | Sp-1F            | ATGCGCGAAGCCGTGATTGCC                    |
|                                        | Sp-2R            | TAGTAAAGCCCTCGCTAG                       |
|                                        | Km-1Fup          | AATCCCCTGCTCGCGCTGCCGCAAGCACTCAGGG       |
|                                        | Km-2Rcom         | AATATTGCGAAGCGGCCAACCTTTCATAGAAGGCG      |
|                                        | Cm-1Fup          | AATCCCCTGCTCGCGCAGCGCTGATGTCGGCGGTTGCT   |
|                                        | Cm-2Rcom         | AATATTGCGAAGCGGCTAACCGTTTTTATCAGGC       |
| Glycosyltransferase disruption         | slr1943-1FpS     | AACGACGGCCAGTGAAGACCGCATGTGTGGCAGT       |
|                                        | slr1943-2Rup     | GCGAGCAGGGGAATTGGCTTGGTGAATTTGTAACC      |
|                                        | slr1943-3Fcom    | CCGCTTCGCAATATTGGCTGGCTTTGAACAACCTTC     |
|                                        | slr1943-4RpS     | AAACAGCTATGACCAATCGGCAATGTAGTGAAAGG      |
|                                        | slr1943-5F       | AAGCCCGTCTGGAGTTTG                       |
|                                        | slr1943-6R       | AATCCGGGTCGATGGTAC                       |
|                                        | slr1063-1FpS     | AACGACGGCCAGTGAATGTCCAAAAATGACAAGC       |
|                                        | slr1063-2Rup     | GCGAGCAGGGGAATTACACGATTGGCGGAAATTTTC     |
|                                        | slr1063-3Fcom    | CCGCTTCGCAATATTCTGGTATATCAGATTACTCG      |
|                                        | slr1063-4RpS     | AAACAGCTATGACCAGCTTGGAGTAAGCTGCATAA      |
|                                        | slr1063-5F       | ATGCGTCGTTTCGGTCCAC                      |
|                                        | slr1063-6R       | TGCAAGACATTCCTGGAC                       |
|                                        | sll0501-1FpS     | AACGACGGCCAGTGAAGGATTAGGCAGGGGTAATA      |
|                                        | sll0501-2Rup     | GCGAGCAGGGGAATTCCTGTCAATTTAGTCAAGTGC     |
|                                        | sll0501-3Fcom    | CCGCTTCGCAATATTGACCATTGAACTGTCTATTGTG    |
|                                        | sll0501-4RpS     | AAACAGCTATGACCAGGTCAGAATCGATACCATGG      |
|                                        | sll0501-5F       | TCAAAGGGAACGTGCTGG                       |
|                                        | sll0501-6R       | GTTGCCTTGGGCGTAATC                       |
|                                        | slr1118-1FpS     | AACGACGGCCAGTGATCCTGCCGCTCAAAGTATTC      |
|                                        | slr1118-2Rup     | GCGAGCAGGGGAATTCGATCGCCGCTTTAGCTAAA      |
|                                        | slr1118-3Fcom    | CCGCTTCGCAATATTTCAAGCTCCCCGTTGGTTAA      |
|                                        | slr1118-4RpS     | AAACAGCTATGACCAGCAGGGGAAATCGTTTGCAT      |
|                                        | slr1118-5F       | CGCACCATATCAGCACG                        |
|                                        | slr1118-6R       | ATCGCTTCGGTTCATGC                        |
|                                        | sll5052_54-1FpS  | AACGACGGCCAGTGATCGCTGTTTGTGGTGAGG        |
|                                        | sll5052_54-2Rup  | GCGAGCAGGGGAATTCATGCTGGCTTGGCCAAATTA     |
|                                        | sll5052_54-3Fcom | CCGCTTCGCAATATTGCTGCTGGATTACAGGAATTG     |
|                                        | sll5052_54-4RpS  | AAACAGCTATGACCACAGGCGGGAGATTGCTAAAA      |
|                                        | sll5052_54-5F    | GGTACTTCGCTGTAGTTC                       |
|                                        | sll5052_54-6R    | GGGCAAACTTCGTCTTC                        |
| xss gene disruption and overexpression | xssA-1FpS        | AACGACGGCCAGTGACCCAGCTTGTAGTGGATTG       |
|                                        | xssA-2Rup        | GCGAGCAGGGGAATTTTCATGCCGCCGATAATGAT      |
|                                        | xssA-3Fcom       | CCGCTTCGCAATATTAGAAATGTGCCACCAGTACCC     |
|                                        | xssA-4RpS        | AAACAGCTATGACCAATCTAGGTTGACCCCTACC       |
|                                        | xssA-5Ftrc       | GAGGAATAAACCATGAAATGTGCCACCAGTACC        |
|                                        | xssA-6F          | GATCGCCAATGGCAAGAT                       |
|                                        | xssA-7R          | ATTGGGTTCTTCAGCGA                        |
|                                        | xssB-1FpS        | AACGACGGCCAGTGAGAGCGTGTGGAAAAGCCCC       |
|                                        | xssB-2Rup        | GCGAGCAGGGGAATTTGGCCATAATCTTGCAAATACTC   |
|                                        | xssB-3Fcom       | CCGCTTCGCAATATTAGGCCATAATTGCTTCAAACAATAG |
|                                        | xssB-4RpS        | AAACAGCTATGACCAGAAATCTACTCCGGACGGT       |
|                                        | xssB-5Ftrc       | GAGGAATAAACCATGGCCATAATTGCTTCAAACAA      |
|                                        | xssB-6F          | GCCAACAAAATCCCCAGA                       |
|                                        | xssB-7R          | AATCCACTACAAGCTGGG                       |
|                                        | xssC-1FpS        | AACGACGGCCAGTGAAGGCTACTGGGTTTGAGGTT      |
|                                        | xssC-2Rup        | GCGAGCAGGGGAATTATCATTTCCCGACGGCGATC      |
|                                        | xssC-3Fcom       | CCGCTTCGCAATATTAGATCCAAGAGTTTCAGCGGTT    |
|                                        | xssC-4RpS        | AAACAGCTATGACCACCGCACAATGGTATCGCTAT      |
|                                        | xssC-5F          | CATTACTTTTTCCCCGCC                       |
|                                        | xssC-6R          | CCGCTGTAAAAAATGCAGC                      |

453

454

455 **Table S5.** Continuing.

| Product (purpose)                      | Primer name | Sequence (5' => 3')                      |
|----------------------------------------|-------------|------------------------------------------|
| xss gene disruption and overexpression | xssE-1FpS   | AACGACGGCCAGTGACCGTCGAGCGAGTTAAGG        |
|                                        | xssE-2Rup   | GCGAGCAGGGGAATTAAGTGTTTCATGGGGGCGTGA     |
|                                        | xssE-3Fcom  | CCGCTTCGCAATATTTAGAACAACCTCTTTCTCGAAT    |
|                                        | xssE-4RpS   | AAACAGCTATGACCAGCTCTTAGGGCGGGGAAAA       |
|                                        | xssE-5Ftrc  | AAGGAGGAATAAACCATGAACAACCTCTTTCTCGAAT    |
|                                        | xssE-6F     | TAGTGAGCAGGGGAAACT                       |
|                                        | xssE-7R     | CACTTACCTGATCGATGAC                      |
|                                        | xssF-1FpS   | AACGACGGCCAGTGACTGCAAAAACGAGGCCATGA      |
|                                        | xssF-2Rup   | GCGAGCAGGGGAATTTGTCATGGATCGTTTGTCTTG     |
|                                        | xssF-3Fcom  | CCGCTTCGCAATATTAGACCCCAAGCCCAACTG        |
|                                        | xssF-4RpS   | AAACAGCTATGACCAATAGACCCGATTGCGTTTCC      |
|                                        | xssF-5F     | CCCATGATGTTGTGGTGT                       |
|                                        | xssF-6R     | TTGCTGACCCTGACTTT                        |
|                                        | xssG-1FpS   | AACGACGGCCAGTGACTCCACGGCATTATTTACCC      |
|                                        | xssG-2Rup   | GCGAGCAGGGGAATTCATACTCCTAACCTCATAACGC    |
|                                        | xssG-3Fcom  | CCGCTTCGCAATATTAGAAAATCACCTTTGTTTTACCCTA |
|                                        | xssG-4RpS   | AAACAGCTATGACCATCATGGATCGTTTGTCTGTTGC    |
|                                        | xssG-5F     | ATCTAGCAGTGGCTTACG                       |
|                                        | xssG-6R     | CCGAAGCCATTGGCTAAT                       |
|                                        | xssH-1FpS   | AACGACGGCCAGTGAGCTGAAAACCCTCGGCTTAA      |
|                                        | xssH-2Rup   | GCGAGCAGGGGAATTCATAGTTACGGCGCCGATG       |
|                                        | xssH-3Fcom  | CCGCTTCGCAATATTAGGCTTCCCTCAATAAACTGG     |
|                                        | xssH-4RpS   | AAACAGCTATGACCATTGGCAAAGTTACCGATCGC      |
|                                        | xssH-5F     | GTAGAAGCAATGCAGTCTG                      |
|                                        | xssH-6R     | GGTATTTACCAACGCCATC                      |
|                                        | xssI-1FpS   | AACGACGGCCAGTGACCAATTTGCAACATCCCGAC      |
|                                        | xssI-2Rup   | GCGAGCAGGGGAATTTAGCCCCGAATCAATTATCC      |
|                                        | xssI-3Fcom  | CCGCTTCGCAATATTAGGTGAGATCGCCCAATTCC      |
|                                        | xssI-4RpS   | AAACAGCTATGACCAAAATGTTGCTGCACCATGGC      |
|                                        | xssI-5F     | AATTCGGTCTAGCTTGCC                       |
|                                        | xssI-6R     | GCTCTTCCAAGCCAGAA                        |
|                                        | xssK-1FpS   | AACGACGGCCAGTGATCTGCCACTTGGTAAACCTC      |
|                                        | xssK-2Rup   | GCGAGCAGGGGAATTTGGAATATTCGGGCGCTTTGA     |
|                                        | xssK-3Fcom  | CCGCTTCGCAATATTTGGTGCGGGTTTATCTCAAC      |
|                                        | xssK-4RpS   | AAACAGCTATGACCAGCAGATTGTTCCGTTTTTGAA     |
|                                        | xssK-5F     | CGCTCCATAAAGATCTC                        |
|                                        | xssK-6R     | TTCTGGAATCTGGGGGAGAA                     |
|                                        | xssM-1FpS   | AACGACGGCCAGTGATCGCTGTTTGTGGTGAGG        |
|                                        | xssM-2Rup   | GCGAGCAGGGGAATTCATGCTGGCTTGCCAAAT        |
|                                        | xssM-3Fcom  | CCGCTTCGCAATATTCTTCCATGGTGGTTAGTGGA      |
|                                        | xssM-4RpS   | AAACAGCTATGACCACAGGCGGGAGATTGCTAAAA      |
|                                        | xssM-5F     | CTGATAGGCTGTTGCTAACC                     |
|                                        | xssM-6R     | GCAGTTGTTTATGGACCCTC                     |
|                                        | xssN-1FpS   | AACGACGGCCAGTGAGGAATTGTGCTTATTGGGCG      |
|                                        | xssN-2Rup   | GCGAGCAGGGGAATTTGGAATTCATTGCTTAGCCC      |
|                                        | xssN-3Fcom  | CCGCTTCGCAATATTAGAATTCATCACGCTTCTCAA     |
|                                        | xssN-4RpS   | AAACAGCTATGACCATATAGGACAGGGCGATCTTC      |
|                                        | xssN-5Ftrc  | GAGGAATAAACCATGAATTCATCACGCTTCTCAA       |
|                                        | xssN-6F     | TCCGCCTACCAACAAA                         |
|                                        | xssN-7R     | GCCACTTGGTAAACCTCT                       |
|                                        | xssO-1FpS   | AACGACGGCCAGTGAGTTAGCCTGGCTCTATGCCA      |
|                                        | xssO-2Rup   | GCGAGCAGGGGAATTAACACCTAACGGTCCGAGA       |
|                                        | xssO-3Fcom  | CCGCTTCGCAATATTAGTTTCGGGGTTGCCTAGCCAA    |
|                                        | xssO-4RpS   | AAACAGCTATGACCAAAATAGCGGCTTTCAGCAACC     |
|                                        | xssO-5F     | ATGAGCAAAGTCGGGTTG                       |
|                                        | xssO-6R     | GGAGAATGAAACGAGACC                       |
|                                        | xssP-1FpS   | AACGACGGCCAGTGACCTCTGCTTCAGATAAAGCTG     |
|                                        | xssP-2Rup   | GCGAGCAGGGGAATTTGCCATAGGTAATCACCAAGGAG   |
|                                        | xssP-3Fcom  | CCGCTTCGCAATATTAGGCTAGCACTATTCAACTGATTG  |
|                                        | xssP-4RpS   | AAACAGCTATGACCATTCTCACCCACTCGGGTGTA      |
|                                        | xssP-5Ftrc  | GAGGAATAAACCATGGCTAGCACTATTCAACTGA       |
|                                        | xssP-6F     | CTGGTGAAGCTTTAAGGG                       |
|                                        | xssP-7R     | AAAATCGAACACCAGCCG                       |

457 **Table S5.** Continuing.

| Product (purpose)                             | Primer name               | Sequence (5' => 3')                    |
|-----------------------------------------------|---------------------------|----------------------------------------|
| <i>xss</i> gene disruption and overexpression | xssQ-1Rup                 | GCGAGCAGGGGAATTGCCATGTTTACAATGATAGAGA  |
|                                               | xssQ-2Fcom                | CCGCTTCGCAATATTAGGCAAAACGTTCCCTTAAAGCT |
|                                               | xssQ-3Ftrc                | GAGGAATAAACCATGGCAAAACGTTCCCTTAAAG     |
|                                               | xssQ-4Rrrn                | CAGACCGCTTCTGCGTTAGCTAACCTTTTCGCC      |
|                                               | xssR-1FpS                 | AACGACGGCCAGTGAGGAGGAAGTAGATGGGTTAC    |
|                                               | xssR-2Rup                 | GCGAGCAGGGGAATTGTGCGAGAAGTCTCAGTCAT    |
|                                               | xssR-3Fcom                | CCGCTTCGCAATATTAGCAATTCGACAGTTTCC      |
|                                               | xssR-4RpS                 | AAACAGCTATGACCAACGTTAACAGCGCCGTTGTT    |
|                                               | xssR-5F                   | CAGACGGAGCAACCTTTT                     |
|                                               | xssR-6R                   | GGAAACTGTCGCAATTGC                     |
|                                               | xssR-7Ftrc                | GAGGAATAAACCATGACTGAGACTTCTCCG         |
|                                               | xssR-8Rrrn                | CAGACCGCTTCTGCGCTACCCCATGACCAGGGC      |
|                                               | xssS-1Rup                 | GCGAGCAGGGGAATTACCTGCAAAAAGGTTGCTCC    |
|                                               | xssS-2Fcom                | CCGCTTCGCAATATTGCGGGGTTGATGGACAATAT    |
|                                               | <i>sll1581</i> disruption | sll1581-1FpS                           |
| sll1581-2Rup                                  |                           | GCGAGCAGGGGAATTTTCCAAGTTCAAGGCCACCA    |
| sll1581-3Fcom                                 |                           | CCGCTTCGCAATATTAGAGTGAACTCATAACCCA     |
| sll1581-4RpS                                  |                           | AAACAGCTATGACCATCTGCCTGTAATCTCTGCAC    |
| sll1581-5F                                    |                           | ATCTGGTGGCCTTGAAC                      |
| sll1581-6R                                    |                           | TTCAGTTGCTTGCAGGCA                     |
| RT-qPCR                                       | mpB-1F                    | GAGAGTTAGGGAGGGAGTTGC                  |
|                                               | mpB-2R                    | AAGGGCGGTATTTTTCTGTG                   |
|                                               | xssA-8F                   | TTGCCACCTACCCTGACAC                    |
|                                               | xssA-9R                   | AGGCGATCGATGGGATGACG                   |
|                                               | xssB-8F                   | CGGCCAGGGGCAATTCAAAC                   |
|                                               | xssB-9R                   | ATTTGGGGAGTGCCATCGGG                   |
|                                               | xssE-8F                   | CAACGCGGCTATGAAGCCAG                   |
|                                               | xssE-9R                   | GCCCCGTAACGCTGTAACCG                   |
|                                               | xssF-7F                   | GCTGGAAACGCAATCGGGTC                   |
|                                               | xssF-8R                   | GTTTACGAGGCCAAAGGCTC                   |
|                                               | xssH-7F                   | CCGCAATCGCTTTACCTGGG                   |
|                                               | xssH-8R                   | GGCGAGAAAGGTCATGGCTG                   |
|                                               | xssK-7F                   | ATTTCCCACCATGCGGCTC                    |
|                                               | xssK-8R                   | CAAGGGACATCCTGTTGGGC                   |
|                                               | xssM-7F                   | GCCATGTTCTGCTGGGTTT                    |
|                                               | xssM-8R                   | GCCCAGAACCAAACTACTGCGG                 |
|                                               | xssN-8F                   | GCAAAGTCGGGTTGGAGTGG                   |
|                                               | xssN-9R                   | CCAAGGCAAAGAACGGTAGGC                  |
|                                               | xssP-8F                   | CGGCTTAACCGGAGAATGGC                   |
| xssP-9R                                       | CCAAGCTCCAGCGTTTCTG       |                                        |
| EMSA                                          | xssEup-1F                 | AGGAAAGAAGTGTTTCATGGG                  |
|                                               | xssEup-2R                 | ATCTTTAAAGCCCCAGTCCC                   |
|                                               | xssQ-5F28a                | TATTTTCAGAGCCATATGGCAAAACGTTCCCTTA     |
|                                               | xssQ-6R28a                | CTCGAATTCGGATCCTTAGCTAACCTTTTCGCC      |
|                                               | pET28a-1R                 | CATATGGCTCTGAAAATACAG                  |
|                                               | pET28a-2F                 | GGATCCGAATTCGAGCTC                     |

459 **Table S6.** List of mutants.

| Strain name                                             | Design                                                                      |
|---------------------------------------------------------|-----------------------------------------------------------------------------|
| <i>Δslr1943</i>                                         | Complete deletion by Sp <sup>R</sup>                                        |
| <i>Δslr1063</i>                                         | Complete deletion by Sp <sup>R</sup>                                        |
| <i>Δsll0501</i>                                         | Complete deletion by Sp <sup>R</sup>                                        |
| <i>Δslr1118</i>                                         | Complete deletion by Sp <sup>R</sup>                                        |
| <i>Δslr5054</i>                                         | Partial deletion by Sp <sup>R</sup> (= $\Delta$ xssK~M)                     |
| <i>ΔxssA</i>                                            | Replacement of the the start codon by Sp <sup>R</sup> and stop codon        |
| <i>ΔxssB</i>                                            | Replacement of the the start codon by Sp <sup>R</sup> and stop codon        |
| <i>ΔxssC</i>                                            | Replacement of the the start codon by Sp <sup>R</sup> and stop codon        |
| <i>ΔxssE</i>                                            | Replacement of the the start codon by Sp <sup>R</sup> and stop codon        |
| <i>ΔxssF</i>                                            | Replacement of the the start codon by Sp <sup>R</sup> and stop codon        |
| <i>ΔxssG</i>                                            | Replacement of the the start codon by Sp <sup>R</sup> and stop codon        |
| <i>ΔxssH</i>                                            | Replacement of the the start codon by Sp <sup>R</sup> and stop codon        |
| <i>ΔxssI</i>                                            | Replacement of the the start codon by Sp <sup>R</sup> and stop codon        |
| <i>ΔxssJ</i>                                            | Replacement of the the start codon by Sp <sup>R</sup> and stop codon        |
| <i>ΔxssK</i>                                            | Replacement of the the start codon by Sp <sup>R</sup> and stop codon        |
| <i>ΔxssM</i>                                            | Replacement of the the start codon by Sp <sup>R</sup> and stop codon        |
| <i>ΔxssN</i>                                            | Replacement of the the start codon by Sp <sup>R</sup> and stop codon        |
| <i>ΔxssO</i>                                            | Replacement of the the start codon by Sp <sup>R</sup> and stop codon        |
| <i>ΔxssP</i>                                            | Replacement of the the start codon by Sp <sup>R</sup> and stop codon        |
| <i>ΔxssQ</i>                                            | Replacement of the the start codon by Sp <sup>R</sup> and stop codon        |
| <i>ΔxssR</i> <sup>*</sup>                               | Partial deletion by Sp <sup>R</sup>                                         |
| <i>ΔxssS</i> <sup>*</sup>                               | Partial deletion by Sp <sup>R</sup>                                         |
| <i>ΔxssR-S</i> <sup>*</sup>                             | Partial deletion by Sp <sup>R</sup>                                         |
| <i>ΔxssK~M</i> + <i>ΔxssS</i> <sup>*</sup>              | <i>xssK~M::Sp<sup>R</sup> + xssS::Cm<sup>R</sup></i>                        |
| <i>OX-xssR</i> <sup>#</sup>                             | <i>slr0846_platform-Km<sup>R</sup>-P<sub>trc</sub>-XssS-T<sub>rmB</sub></i> |
| <i>OX-xssQ</i> <sup>#</sup>                             | <i>IS203_platform-Cm<sup>R</sup>-P<sub>trc</sub>-XssQ-T<sub>rmB</sub></i>   |
| <i>ΔxssQ</i> + <i>OX-xssR</i>                           | Simple combination                                                          |
| <i>ΔxssR</i> <sup>*</sup> + <i>OX-xssQ</i> <sup>#</sup> | Simple combination                                                          |
| <i>OX-xssP</i> <sup>#</sup>                             | Replacement of the the native promoter to Cm <sup>R</sup> -P <sub>trc</sub> |
| <i>ΔxssT</i>                                            | Complete deletion by Km <sup>R</sup>                                        |

460

461 \*Almost complete segregation. #Partial segregation.

462

463 the transformed DNA in the multicopy genome was confirmed by PCR using primers listed in Table S5,

464 and the transformants are listed in Table S6.

465

#### 466 *Bloom formation*

467 The bloom was reproducibly formed using the two-step culture regime we developed in this

468 work. Before the bloom formation experiment, cells were precultured once in liquid after transfer from

469 plates. In the first step, cells inoculated at  $OD_{730} = 0.2$  were grown with vigorous aeration under

470 continuous light at 31°C or 20°C for 48 h. Typically the cell density reached  $OD_{730} \sim 2$ . In the second

471 step, the culture was shifted to the standing condition without bubbling under the same continuous light

472 for another 48 h (or longer) for cells to rise to the surface. Regarding the mutants of transmembrane

473 glycosyltransferases, bloom formation was examined after 168 h of the second-step culture. The final

474 concentration of the photosynthesis inhibitor DCMU (3-(3,4-dichlorophenyl)-1,1-dimethylurea) was

475 100  $\mu$ M.



476

477 ***EPS fractionation***

478           The fractionation method to isolate the crude EPS is shown in Fig. S1A. The viscous  
479 materials including cells after the second step of culture were collected by filtration using a 1.0- $\mu\text{m}$  pore  
480 PTFE membrane (Millipore). The trapped materials were gently and carefully recovered from the  
481 membrane using MilliQ water with the aid of flat-tip tweezers. The collected sample was vortexed and  
482 then centrifuged at  $20,000 \times g$  for 10 min to remove cells. The supernatant constituted the crude EPS  
483 that contained viscous EPS and possibly CPS.

484           The refined fractionation method to isolate EPS is shown in Fig. 1F. The entire culture at the  
485 end of the first step, which did not contain gas bubbles, was first centrifuged at  $10,000 \times g$  for 10 min  
486 to remove cells and CPS and then filtered through a 1.0- $\mu\text{m}$  pore PTFE membrane. The trapped EPS  
487 was carefully recovered as described above. The flowthrough of the filtration was regarded as free  
488 polysaccharides, which were recovered by ethanol precipitation. CPS was released from the cell pellet

489 by vigorous vortexing with MilliQ water and recovered by centrifugation to remove cells ( $20,000 \times g$   
490 for 10 min).

491

#### 492 ***Sugar quantification***

493 Total sugar was quantified using the phenol-sulfate method (*DuBois et al., 1956*). A 100- $\mu$ L  
494 aliquot of 5% (w/w) phenol was added to 100  $\mu$ L of a sample in a glass tube and vortexed three times  
495 for 10 s. Then, 500  $\mu$ L of concentrated sulfuric acid was added, and the tube was immediately vortexed  
496 three times for 10 s and then kept at 30°C for 30 min in a water bath. Sugar content was measured by  
497 absorption at 487 nm using a UV-2600PC spectrophotometer (Shimadzu, Japan, Tokyo). Any  
498 contamination of the BG11 medium was evident by slight background coloration. This background was  
499 subtracted on the basis of the extrapolation of absorption at 430 nm, where the coloration due to sugars  
500 was minimal. Glucose was used as the standard. Some EPS samples were highly viscous, so we vortexed  
501 and sonicated them before measurement. Statistical significance was determined using Welch's *t* test.

502

503 ***Sugar composition analysis***

504 The collected EPS samples were dialyzed with MilliQ water and then freeze-dried for 3 days.

505 Sugar composition was analysed by Toray Research Center, Inc. (Tokyo, Japan). A part of the fluffy

506 sample (WT, 0.298 mg;  $\Delta xssS$ , 0.203 mg) was dissolved in 200  $\mu$ L of 2 M trifluoroacetic acid and

507 hydrolysed at 100°C for 6 h. The treated sample was vacuum-dried with a centrifugal evaporator,

508 redissolved in 400  $\mu$ L MilliQ water, and filtered through a 0.22- $\mu$ m pore filter. This sample was used for

509 the analysis.

510 Monosaccharide composition was determined by HPLC with the LC-20A system (Shimadzu).

511 For neutral sugars, the column was TSK-gel Sugar AXG (TOSOH, Japan) and the temperature was 70°C.

512 The mobile phase was 0.5 M potassium borate (pH 8.7) at 0.4 mL/min. Post-column labelling was

513 performed using 1% (w/v) arginine and 3% (w/v) boric acid at 0.5 mL/min, 150°C. For uronic acids, the

514 column was a Shimpack ISA-07 (Shimadzu) and the temperature was 70°C. The mobile phase was 1.0

515 M potassium borate (pH 8.7) at 0.8 mL/min. Post-column labelling was performed using 1% (w/v)  
516 arginine and 3% (w/v) boric acid at 0.8 mL/min, 150°C. The detector was a RF-10A<sub>XL</sub> (Shimadzu), with  
517 excitation at 320 nm and emission at 430 nm. The standard curves were prepared for each  
518 monosaccharide with standard samples.

519 The SO<sub>4</sub><sup>2-</sup> content was determined by anion exchange column chromatography using the  
520 ISC-2100 system (Thermo Fisher Scientific, USA, Massachusetts). The column was eluted via a  
521 gradient of 0–1.0 M KOH. The separation column was IonPac ASI I-HC-4 μm (Thermo Fisher  
522 Scientific). Electric conductivity was used for detection.

523

#### 524 *Alcian blue staining*

525 The polysaccharides were stained with 1% Alcian blue 8GX (Merck) for 10 min in 3 % acetic  
526 acid (pH 2.5) or 0.5 N HCl (pH 0.5) as previously described (*Di Pippo et al., 2013*).

527

528 **qPCR**

529           The qPCR was performed as described in our previous work (*Maeda et al., 2018*). Cells were  
530 harvested by centrifugation at  $5000 \times g$  for 10 min at 4°C. Cell disruption and RNA extraction were  
531 done using an RNeasy Mini kit for bacteria (Qiagen, Venlo, Netherlands). In addition, cells were  
532 disrupted five times by mechanical homogenization with zirconia beads (0.1-mm diameter) in a  
533 microhomogenizing system (Micro Smash MS-100, TOMY SEIKO, Tokyo, Japan) at 5,000 rpm for 40  
534 s. For cDNA preparation, RNA was reverse-transcribed using random primers (PrimeScript RT reagent  
535 kit with gDNA eraser, Takara). Real-time PCR was performed using the THUNDERBIRD SYBR qPCR  
536 Mix (Toyobo) and the Thermal Cycler Dice Real Time System II (Takara). The transcript level in each  
537 strain was normalized to the internal control (*rnpB*). The primers used are listed in Table S5.

538

539 **EMSA** (electrophoretic mobility shift assay)

540           The expression and purification of recombinant His-tagged proteins and EMSA were

541 performed as described in our previous works (*Hirose et al., 2010, Maeda et al., 2014*). In brief, His-  
542 tagged XssQ was expressed using pET28a vector system and *E. coli* C41(DE3) strain. The protein was  
543 purified by Histrap HP column (Cytiva, Tokyo, Japan) and AKTA prime system (Cytiva). For probe and  
544 native competitor, the upstream region of *xssE* was amplified with the primer set xssEup-1F/2R (total  
545 251 bp). As a mutant competitor, the same region of the chemically synthesized DNA fragment  
546 containing mutations in the two consensus sequences was used for amplification with the same primer  
547 set as mention above. Labelling of the DNA probe, electrophoresis, and autoradiography were  
548 performed as described (*Midorikawa et al., 2009*). We incubated the aliquots of the XssQ protein (0,  
549 500, 1000, or 3000 ng/lane) with the radiolabeled probe for 30 min at room temperature. For competition,  
550 3000 ng of XssQ was incubated with the probe and 20 pmol of unlabeled competitors (native or mutant).

551

## 552 ***RNA-seq analysis***

553 RNA-seq analysis was performed as described in our previous work (*Ohbayashi et al., 2016*).

554 Total RNA of *Synechocystis* 6803 was extracted as described in the qPCR protocol. The contaminated  
555 genome DNA was removed by TURBO DNA-free™ Kit (Thermo Fisher Scientific).

556

### 557 ***Bioinformatics analysis***

558 The sequences of the proteins were obtained from NCBI (<http://www.ncbi.nlm.nih.gov/>) and  
559 Pfam (<http://pfam.xfam.org/>) (*Finn et al., 2016*). The domain architecture was searched using the Simple  
560 Modular Architecture Research Tool, SMART (*Letunic et al., 2015*). Glycosyltransferase classifications  
561 were based on the CAZy database (<http://www.cazy.org/>) (*Henrissat, 1991, Lombard et al., 2013*).  
562 Amino acid sequence similarity was evaluated by NCBI BLAST search.

563

### 564 **Acknowledgements**

565 This study was supported by Grants-in-Aid for JSPS Fellows 15J07605 and 19J01251 (to  
566 K.M.), the Japan Society for the Promotion of Science for Scientific Research (16H06558 to M.I.), and

567 the JST for CREST program (JPMJCR1653 to M.I.).

568



569 **References**

- 570 Beard SJ, Hayes PK, Pfeifer F, Walsby AE. 2002. The sequence of the major gas vesicle protein,  
571 GvpA, influences the width and strength of halobacterial gas vesicles. *FEMS microbiology*  
572 *letters* **213**:149-157
- 573 Bellezza S, Albertano P, de Philippis R, Paradossi G. 2006. Exopolysaccharides of two  
574 cyanobacterial strains from Roman hypogea. *Geomicrobiology Journal* **23**:301-310
- 575 Casero MC, Velázquez D, Medina-Cobo M, Quesada A, Cirés S. 2019. Unmasking the identity of  
576 toxigenic cyanobacteria driving a multi-toxin bloom by high-throughput sequencing of  
577 cyanotoxins genes and 16S rRNA metabarcoding. *Science of The Total Environment*  
578 **665**:367-378
- 579 Chen M, Tian L-L, Ren C-Y, Xu C-Y, Wang Y-Y, Li L. 2019. Extracellular polysaccharide synthesis  
580 in a bloom-forming strain of *Microcystis aeruginosa*: implications for colonization and  
581 buoyancy. *Scientific reports* **9**:1-11
- 582 Chin T, Okuda Y, Ikeuchi M. 2018. Sorbitol production and optimization of photosynthetic supply  
583 in the cyanobacterium *Synechocystis* PCC 6803. *Journal of biotechnology* **276**:25-33
- 584 Danot O, Marquenet E, Vidal-Ingigliardi D, Richet E. 2009. Wheel of Life, Wheel of Death: A  
585 Mechanistic Insight into Signaling by STAND Proteins. *Structure* **17**:172-182. DOI:  
586 10.1016/j.str.2009.01.001
- 587 De Philippis R, Vincenzini M. 1998. Exocellular polysaccharides from cyanobacteria and their  
588 possible applications. *FEMS Microbiology Reviews* **22**:151-175
- 589 Dervaux J, Mejean A, Brunet P. 2015. Irreversible collective migration of cyanobacteria in eutrophic  
590 conditions. *PLoS One* **10**:e0120906
- 591 Di Pippo F, Ellwood NT, Gismondi A, Bruno L, Rossi F, Magni P, De Philippis R. 2013.  
592 Characterization of exopolysaccharides produced by seven biofilm-forming cyanobacterial  
593 strains for biotechnological applications. *Journal of Applied Phycology* **25**:1697-1708

- 594 du Plooy S, Perissinotto R, Smit A, Muir D. 2015. Role of salinity, nitrogen fixation and nutrient  
595 assimilation in prolonged bloom persistence of *Cyanothece* sp. in Lake St Lucia, South  
596 Africa. *Aquatic Microbial Ecology* **74**:73-83
- 597 DuBois M, Gilles KA, Hamilton JK, Rebers Pt, Smith F. 1956. Colorimetric method for  
598 determination of sugars and related substances. *Analytical chemistry* **28**:350-356
- 599 Enomoto G, Narikawa R, Ikeuchi M. 2015. Three cyanobacteriochromes work together to form a  
600 light color-sensitive input system for c-di-GMP signaling of cell aggregation. *Proceedings of*  
601 *the National Academy of Sciences* **112**:8082-8087
- 602 Finn RD, Coggill P, Eberhardt RY, Eddy SR, Mistry J, Mitchell AL, Potter SC, Punta M, Qureshi  
603 M, Sangrador-Vegas A. 2016. The Pfam protein families database: towards a more  
604 sustainable future. *Nucleic acids research* **44**:D279-D285
- 605 Fisher ML, Allen R, Luo Y, Curtiss R, 3rd. 2013. Export of extracellular polysaccharides modulates  
606 adherence of the Cyanobacterium *synechocystis*. *PLoS One* **8**:e74514. DOI:  
607 10.1371/journal.pone.0074514, PMID: PMC3769361
- 608 Flombaum P, Gallegos JL, Gordillo RA, Rincón J, Zabala LL, Jiao N, Karl DM, Li WK, Lomas MW,  
609 Veneziano D. 2013. Present and future global distributions of the marine Cyanobacteria  
610 Prochlorococcus and Synechococcus. *Proceedings of the National Academy of Sciences*  
611 **110**:9824-9829
- 612 Flores C, Lima RT, Adessi A, Sousa A, Pereira SB, Granja PL, De Philippis R, Soares P, Tamagnini  
613 P. 2019a. Characterization and antitumor activity of the extracellular carbohydrate  
614 polymer from the cyanobacterium *Synechocystis* DeltasigF mutant. *Int J Biol Macromol*  
615 **136**:1219-1227. DOI: 10.1016/j.ijbiomac.2019.06.152
- 616 Flores C, Santos M, Pereira SB, Mota R, Rossi F, De Philippis R, Couto N, Karunakaran E, Wright  
617 PC, Oliveira P, Tamagnini P. 2019b. The alternative sigma factor SigF is a key player in the  
618 control of secretion mechanisms in *Synechocystis* sp. PCC 6803. *Environ Microbiol* **21**:343-  
619 359. DOI: 10.1111/1462-2920.14465

- 620 Foster JS, Havemann SA, Singh AK, Sherman LA. 2009. Role of mrgA in peroxide and light stress  
621 in the cyanobacterium *Synechocystis* sp. PCC 6803. *FEMS Microbiol Lett* **293**:298-304.  
622 DOI: 10.1111/j.1574-6968.2009.01548.x
- 623 Freitas F, Alves V, Reis M. 2014. Bacterial polysaccharides: production and applications in cosmetic  
624 industry Springer International Publishing Cham.
- 625 Fujishiro T, Ogawa T, Matsuoka M, Nagahama K, Takeshima Y, Hagiwara H. 2004. Establishment  
626 of a pure culture of the hitherto uncultured unicellular cyanobacterium *Aphanothece*  
627 *sacrum*, and phylogenetic position of the organism. *Applied and environmental*  
628 *microbiology* **70**:3338-3345. DOI: 10.1128/AEM.70.6.3338-3345.2004, PMID: PMC427778
- 629 Ghosh T, Chattopadhyay K, Marschall M, Karmakar P, Mandal P, Ray B. 2009. Focus on antivirally  
630 active sulfated polysaccharides: from structure-activity analysis to clinical evaluation.  
631 *Glycobiology* **19**:2-15. DOI: 10.1093/glycob/cwn092
- 632 Harke MJ, Steffen MM, Gobler CJ, Otten TG, Wilhelm SW, Wood SA, Paerl HW. 2016. A review of  
633 the global ecology, genomics, and biogeography of the toxic cyanobacterium, *Microcystis* spp.  
634 *Harmful Algae* **54**:4-20
- 635 Hayashi T, Hayashi K, Maeda M, Kojima I. 1996. Calcium spirulan, an inhibitor of enveloped virus  
636 replication, from a blue-green alga *Spirulina platensis*. *Journal of natural products* **59**:83-  
637 87
- 638 Henrissat B. 1991. A classification of glycosyl hydrolases based on amino acid sequence similarities.  
639 *Biochemical Journal* **280**:309-316
- 640 Hirose Y, Narikawa R, Katayama M, Ikeuchi M. 2010. Cyanobacteriochrome CcaS regulates  
641 phycoerythrin accumulation in *Nostoc punctiforme*, a group II chromatic adapter.  
642 *Proceedings of the National Academy of Sciences* **107**:8854-8859
- 643 Huisman J, Codd GA, Paerl HW, Ibelings BW, Verspagen JM, Visser PM. 2018. Cyanobacterial  
644 blooms. *Nature Reviews Microbiology* **16**:471-483
- 645 Islam ST, Lam JS. 2014. Synthesis of bacterial polysaccharides via the Wzx/Wzy-dependent

- 646 pathway. *Canadian journal of microbiology* **60**:697-716
- 647 Jiao G, Yu G, Zhang J, Ewart HS. 2011. Chemical structures and bioactivities of sulfated  
648 polysaccharides from marine algae. *Marine Drugs* **9**:196-223. DOI: 10.3390/md9020196,  
649 PMID: PMC3093253
- 650 Jittawuttipoka T, Planchon M, Spalla O, Benzerara K, Guyot F, Cassier-Chauvat C, Chauvat F.  
651 2013. Multidisciplinary evidences that *Synechocystis* PCC6803 exopolysaccharides operate  
652 in cell sedimentation and protection against salt and metal stresses. *PLoS One* **8**:e55564
- 653 Karamanos NK, Piperigkou Z, Theocharis AD, Watanabe H, Franchi M, Baud S, Brezillon S, Go  
654 tte M, Passi A, Vigetti D. 2018. Proteoglycan chemical diversity drives multifunctional cell  
655 regulation and therapeutics. *Chemical reviews* **118**:9152-9232
- 656 Katzen F, Ferreiro DU, Oddo CG, Ielmini MV, Becker A, Pühler A, Ielpi L. 1998. Xanthomonas  
657 campestris pv. campestris gum Mutants: Effects on Xanthan Biosynthesis and Plant  
658 Virulence. *Journal of bacteriology* **180**:1607-1617
- 659 Kawano Y, Saotome T, Ochiai Y, Katayama M, Narikawa R, Ikeuchi M. 2011. Cellulose  
660 accumulation and a cellulose synthase gene are responsible for cell aggregation in the  
661 cyanobacterium *Thermosynechococcus vulcanus* RKN. *Plant and Cell Physiology* **52**:957-  
662 966
- 663 Kopf M, Klähn S, Pade N, Weingärtner C, Hagemann M, Voß B, Hess WR. 2014a. Comparative  
664 genome analysis of the closely related *Synechocystis* strains PCC 6714 and PCC 6803. *DNA*  
665 *research* **21**:255-266
- 666 Kopf M, Klähn S, Scholz I, Matthiessen JK, Hess WR, Voß B. 2014b. Comparative analysis of the  
667 primary transcriptome of *Synechocystis* sp. PCC 6803. *DNA research* **21**:527-539
- 668 Kumar D, Kastanek P, Adhikary SP. 2018. Exopolysaccharides from cyanobacteria and microalgae  
669 and their commercial application. *Current Science* **115**:234-241
- 670 Lapasin R, Pricl S, 1995. Industrial applications of polysaccharides *Rheology of Industrial*  
671 *Polysaccharides: Theory and Applications*. Springer. p134-161.

- 672 Letunic I, Doerks T, Bork P. 2015. SMART: recent updates, new developments and status in 2015.  
673 *Nucleic acids research* **43**:D257-D260
- 674 Lombard V, Golaconda Ramulu H, Drula E, Coutinho PM, Henrissat B. 2013. The carbohydrate-  
675 active enzymes database (CAZy) in 2013. *Nucleic acids research* **42**:D490-D495
- 676 Maeda K, Narikawa R, Ikeuchi M. 2014. CugP is a novel ubiquitous non-GalU-type bacterial UDP-  
677 glucose pyrophosphorylase found in cyanobacteria. *Journal of bacteriology* **196**:2348-2354
- 678 Maeda K, Tamura J, Okuda Y, Narikawa R, Midorikawa T, Ikeuchi M. 2018. Genetic identification  
679 of factors for extracellular cellulose accumulation in the thermophilic cyanobacterium  
680 *Thermosynechococcus vulcanus*: proposal of a novel tripartite secretion system. *Molecular*  
681 *Microbiology* **109**:121-134
- 682 Mangan NM, Flamholz A, Hood RD, Milo R, Savage DF. 2016. pH determines the energetic  
683 efficiency of the cyanobacterial CO<sub>2</sub> concentrating mechanism. *Proceedings of the National*  
684 *Academy of Sciences* **113**:E5354-E5362
- 685 Merel S, Walker D, Chicana R, Snyder S, Baurès E, Thomas O. 2013. State of knowledge and  
686 concerns on cyanobacterial blooms and cyanotoxins. *Environment international* **59**:303-327
- 687 Midorikawa T, Matsumoto K, Narikawa R, Ikeuchi M. 2009. An Rrf2-type transcriptional regulator  
688 is required for expression of psaAB genes in the cyanobacterium *Synechocystis* sp. PCC  
689 6803. *Plant physiology* **151**:882-892
- 690 Mota R, Vidal R, Pandeirada C, Flores C, Adessi A, De Philippis R, Nunes C, Coimbra MA,  
691 Tamagnini P. 2020. Cyanoflan: A cyanobacterial sulfated carbohydrate polymer with  
692 emulsifying properties. *Carbohydrate Polymers* **229**:115525. DOI:  
693 10.1016/j.carbpol.2019.115525
- 694 Mougous JD, Green RE, Williams SJ, Brenner SE, Bertozzi CR. 2002. Sulfotransferases and  
695 sulfatases in mycobacteria. *Chemistry & biology* **9**:767-776
- 696 Mouhim RF, Cornet J-F, Fontane T, Fournet B, Dubertret G. 1993. Production, isolation and  
697 preliminary characterization of the exopolysaccharide of the cyanobacterium *Spirulina*

- 698 *platensis*. *Biotechnology letters* **15**:567-572
- 699 Ngatu NR, Okajima MK, Yokogawa M, Hirota R, Eitoku M, Muzembo BA, Dumavibhat N, Takaishi  
700 M, Sano S, Kaneko T. 2012. Anti-inflammatory effects of sacran, a novel polysaccharide  
701 from *Aphanothece sacrum*, on 2, 4, 6-trinitrochlorobenzene-induced allergic dermatitis in  
702 vivo. *Annals of Allergy, Asthma & Immunology* **108**:117-122. e112
- 703 Ohbayashi R, Watanabe S, Ehira S, Kanesaki Y, Chibazakura T, Yoshikawa H. 2016. Diversification  
704 of DnaA dependency for DNA replication in cyanobacterial evolution. *The ISME journal*  
705 **10**:1113-1121
- 706 Okajima MK, Bamba T, Kaneko Y, Hirata K, Fukusaki E, Kajiyama Si, Kaneko T. 2008. Supergiant  
707 ampholytic sugar chains with imbalanced charge ratio form saline ultra-absorbent  
708 hydrogels. *Macromolecules* **41**:4061-4064
- 709 Panoff J-M, Priem B, Morvan H, Joset F. 1988. Sulphated exopolysaccharides produced by two  
710 unicellular strains of cyanobacteria, *Synechocystis* PCC 6803 and 6714. *Archives of*  
711 *microbiology* **150**:558-563
- 712 Pereira S, Zille A, Micheletti E, Moradas-Ferreira P, De Philippis R, Tamagnini P. 2009. Complexity  
713 of cyanobacterial exopolysaccharides: composition, structures, inducing factors and  
714 putative genes involved in their biosynthesis and assembly. *FEMS Microbiology Reviews*  
715 **33**:917-941
- 716 Pereira SB, Mota R, Vieira CP, Vieira J, Tamagnini P. 2015. Phylum-wide analysis of genes/proteins  
717 related to the last steps of assembly and export of extracellular polymeric substances (EPS)  
718 in cyanobacteria. *Scientific reports* **5**
- 719 Pereira SB, Santos M, Leite JP, Flores C, Eisfeld C, Büttel Z, Mota R, Rossi F, De Philippis R, Gales  
720 L. 2019. The role of the tyrosine kinase Wzc (Sl10923) and the phosphatase Wzb (Slr0328)  
721 in the production of extracellular polymeric substances (EPS) by *Synechocystis* PCC 6803.  
722 *MicrobiologyOpen* **8**:e00753
- 723 Sasisekharan R, Raman R, Prabhakar V. 2006. Glycomics approach to structure-function

- 724 relationships of glycosaminoglycans. *Annu Rev Biomed Eng* **8**:181-231
- 725 Schmid J, Sieber V, Rehm B. 2015. Bacterial exopolysaccharides: biosynthesis pathways and  
726 engineering strategies. *Frontiers in microbiology* **6**:496. DOI: 10.3389/fmicb.2015.00496,  
727 PMID: PMC4443731
- 728 Stanier R, Kunisawa R, Mandel M, Cohen-Bazire G. 1971. Purification and properties of unicellular  
729 blue-green algae (order *Chroococcales*). *Bacteriological reviews* **35**:171-205
- 730 Steffen MM, Li Z, Effler TC, Hauser LJ, Boyer GL, Wilhelm SW. 2012. Comparative metagenomics  
731 of toxic freshwater cyanobacteria bloom communities on two continents. *PLoS One*  
732 **7**:e44002
- 733 Vial L, Hommais F. 2020. Plasmid - chromosome cross - talks. *Environmental Microbiology* **22**:540-  
734 556
- 735 Walsby A. 1994. Gas vesicles. *Microbiological reviews* **58**:94-144
- 736 Wardrop D, Keeling D. 2008. The story of the discovery of heparin and warfarin. *British journal of*  
737 *haematology* **141**:757-763
- 738 Wei K, Jung S, Amano Y, Machida M. 2019. Control of the buoyancy of *Microcystis aeruginosa* via  
739 colony formation induced by regulating extracellular polysaccharides and cationic ions. *SN*  
740 *Applied Sciences* **1**:1573
- 741 Willis LM, Whitfield C. 2013. Structure, biosynthesis, and function of bacterial capsular  
742 polysaccharides synthesized by ABC transporter-dependent pathways. *Carbohydrate*  
743 *Research* **378**:35-44
- 744 Woodward L, Naismith JH. 2016. Bacterial polysaccharide synthesis and export. *Current Opinion*  
745 *in Structural Biology* **40**:81-88
- 746 Yoshihara S, Suzuki F, Fujita H, Geng XX, Ikeuchi M. 2000. Novel putative photoreceptor and  
747 regulatory genes required for the positive phototactic movement of the unicellular motile  
748 cyanobacterium *Synechocystis* sp. PCC 6803. *Plant and Cell Physiology* **41**:1299-1304
- 749
